# Supplementary material for: In silico evaluation of the role of lisdexamfetamine on attention-deficit/hyperactivity disorder common psychiatric comorbidities: mechanistic insights on binge eating disorder and depression
Source: Front Neurosci. 2023 Jun 30;17:1118253. doi: 10.3389/fnins.2023.1118253 (PMC10347683; doi:10.3389/fnins.2023.1118253)
Supplement: Supplementary file 2 [file Data_Sheet_2.xlsx]

## Sheet: Title page
SUPPLEMENTARY TABLES In silico evaluation of the role of lisdexamfetamine on attention-deficit/hyperactivity disorder common psychiatric comorbidities: mechanistic insights on binge eating disorder and depression José Ramón Gutiérrez Casares1٭, Cristina Segú-Vergés2,3, Juncal Sabate Chueca4, Tamara Pozo-Rubio4, Mireia Coma2, Carmen Montoto4, Javier Quintero5 1 Unidad Ambulatoria de Psiquiatría y …

## Sheet: A
Supplementary Table A*. Proteins included in the diseases molecular characterization (ADHD and evaluated psychiatric comorbidities). Activation in disease column indicates whether the protein is increased/overactivated (1) or reduced/inhibited (-1) in the context of each disease (1/-1 denote conflicting or complex role of the protein on the disease). Note that proteins can be repeated in more tha…
Disease and motive	Protein name	Gene name	Uniprot code	Activation in disease	References
ADHD - Neurotransmitter imbalance	Flotillin-1	FLOT1	O75955	1	[1] PMID: 22514303; [2] PMID: 22514303; [3]PMID: 22710269
ADHD - Neurotransmitter imbalance	Interleukin-1 beta	IL1B	P01583	1	[1] PMID: 11803448
ADHD - Neurotransmitter imbalance	Ferritin light chain	FTL	P02792	-1	[1] PMID: 25298126; [2] PMID: 28046016
ADHD - Neurotransmitter imbalance	Ferritin heavy chain	FTH1	P02794	-1	[1] PMID: 25298126; [2] PMID: 28046016
ADHD - Neurotransmitter imbalance	Dopamine beta-hydroxylase	DBH	P09172	-1	[1] PMID: 25298126
ADHD - Neurotransmitter imbalance	D(2) dopamine receptor	DRD2	P14416	1	[1] PMID: 30511754; [2] PMID: 22610946; [3] PMID: 27836462
ADHD - Neurotransmitter imbalance	Amine oxidase [flavin-containing] A, EC 1.4.3.4	MAOA	P21397	1	[1] DOI: 10.1590/S0101-60832011000100008
ADHD - Neurotransmitter imbalance	D(1A) dopamine receptor	DRD1	P21728	-1	[1] PMID: 30511754; [2] PMID: 22610946
ADHD - Neurotransmitter imbalance	D(4) dopamine receptor	DRD4	P21917	-1	[1] PMID: 24259639; [2] PMID: 30511754; [3] PMID: 21903599; [4] PMID: 22610946
ADHD - Neurotransmitter imbalance	D(1B) dopamine receptor	DRD5	P21918	-1	[1] PMID: 24259640; [2] PMID: 22610946
ADHD - Neurotransmitter imbalance	Catechol O-methyltransferase	COMT	P21964	1	[1] PMID: 28687733; [2] PMID: 22640745
ADHD - Neurotransmitter imbalance	Sodium-dependent noradrenaline transporter	SLC6A2	P23975	1	[1] DOI: 10.4103/2231-0738.191660; [2] PMID: 25445492
ADHD - Neurotransmitter imbalance	Substance-P receptor	TACR1	P25103	-1	[1] PMID: 23681253
ADHD - Neurotransmitter imbalance	5-hydroxytryptamine receptor 1B	HTR1B	P28222	-1	[1] PMID: 12556913
ADHD - Neurotransmitter imbalance	5-hydroxytryptamine receptor 2A	HTR2A	P28223	-1	[1] PMID: 12192616; [2] PMID: 11032388; [3] PMID: 12167522
ADHD - Neurotransmitter imbalance	Sodium- and chloride-dependent GABA transporter 1	SLC6A1	P30531	-1	[1] PMID: 26072958
ADHD - Neurotransmitter imbalance	RAC-alpha serine/threonine-protein kinase	AKT1	P31749	1	[1] PMID: 25647412
ADHD - Neurotransmitter imbalance	RAC-beta serine/threonine-protein kinase	AKT2	P31751	1	[1] PMID: 25647412
ADHD - Neurotransmitter imbalance	D(3) dopamine receptor	DRD3	P35462	1	[1] PMID: 30511754; [2] PMID: 22610946; [3] PMID: 27836462
ADHD - Neurotransmitter imbalance	Signal transducer and activator of transcription 6	STAT6	P42226	-1	[1] PMID: 24493267
ADHD - Neurotransmitter imbalance	Synaptosomal-associated protein 25	SNAP25	P60880	-1	[1] PMID: 23593184; [2] PMID: 29608877
ADHD - Neurotransmitter imbalance	Sodium-dependent dopamine transporter	SLC6A3	Q01959	1	[1] PMID: 25647412; [2] PMID: 15950014
ADHD - Neurotransmitter imbalance	BDNF/NT-3 growth factors receptor	NTRK2	Q16620	-1	[1] PMID: 25354496
ADHD - Neurotransmitter imbalance	Calcium/calmodulin-dependent protein kinase II inhibitor 1	CAMK2N1	Q7Z7J9	1	[1] PMID: 22514303; [2] PMID: 24561222
ADHD - Neurotransmitter imbalance	Tryptophan 5-hydroxylase 2	TPH2	Q8IWU9	-1	[1] PMID: 27871272; [2] PMID: 28202785
ADHD - Neurotransmitter imbalance	Glutamate decarboxylase 1	GAD1	Q99259	-1	[1] PMID: 31103523
ADHD - Neurotransmitter imbalance	Cell adhesion molecule 1	CADM1	Q9BY67	1	[1] PMID: 25647412
ADHD - Neurotransmitter imbalance	RAC-gamma serine/threonine-protein kinase	AKT3	Q9Y243	1	[1] PMID: 25647412
ADHD - Neuroinflammation and defective immunoregulation	Complement C5	C5	P01031	-1	[1] PMID: 21432611
ADHD - Neuroinflammation and defective immunoregulation	Lymphotoxin-alpha	LTA	P01374	1	[1] PMID: 24493267
ADHD - Neuroinflammation and defective immunoregulation	Tumor necrosis factor	TNF	P01375	1	[1] PMID: 24493267
ADHD - Neuroinflammation and defective immunoregulation	Interferon gamma	IFNG	P01579	-1	[1] PMID: 24493267
ADHD - Neuroinflammation and defective immunoregulation	Interleukin-1 beta	IL1B	P01583	1	[1] PMID: 24493267
ADHD - Neuroinflammation and defective immunoregulation	Interleukin-1 alpha	IL1A	P01584	1	[1] PMID: 24493267
ADHD - Neuroinflammation and defective immunoregulation	C-reactive protein	CRP	P02741	1	[1] PMID: 21432611
ADHD - Neuroinflammation and defective immunoregulation	Protein S100-B	S100B	P04271	-1	[1] PMID: 20534153
ADHD - Neuroinflammation and defective immunoregulation	Interleukin-4	IL4	P05112	-1	[1] PMID: 24493267
ADHD - Neuroinflammation and defective immunoregulation	Interleukin-5	IL5	P05113	-1	[1] PMID: 30350094
ADHD - Neuroinflammation and defective immunoregulation	Interleukin-6	IL6	P05231	1	[1] PMID: 24493267
ADHD - Neuroinflammation and defective immunoregulation	Alpha-2A adrenergic receptor	ADRA2A	P08913	1	[1] PMID: 21432611; [2] PMID: 30596206
ADHD - Neuroinflammation and defective immunoregulation	Complement C4-B	C4B	P0C0L5	-1	[1] PMID: 24493267
ADHD - Neuroinflammation and defective immunoregulation	cAMP-dependent protein kinase catalytic subunit alpha	PRKACA	P17612	-1	[1] PMID: 21432611
ADHD - Neuroinflammation and defective immunoregulation	Interleukin-1 receptor antagonist protein	IL1RN	P18510	-1	[1] PMID: 11803448; [2] PMID: 21432611
ADHD - Neuroinflammation and defective immunoregulation	Nuclear factor NF-kappa-B p105 subunit	NFKB1	P19838	1	[1] PMID: 21432611
ADHD - Neuroinflammation and defective immunoregulation	Interleukin-10	IL10	P22301	-1	[1] PMID: 24493267
ADHD - Neuroinflammation and defective immunoregulation	cAMP-dependent protein kinase catalytic subunit gamma	PRKACG	P22612	-1	[1] PMID: 21432611
ADHD - Neuroinflammation and defective immunoregulation	cAMP-dependent protein kinase catalytic subunit beta	PRKACB	P22694	-1	[1] PMID: 21432611
ADHD - Neuroinflammation and defective immunoregulation	Mitogen-activated protein kinase 3	MAPK3	P27361	1	[1] PMID: 21432611
ADHD - Neuroinflammation and defective immunoregulation	Interleukin-13	IL13	P35225	1	[1] PMID: 20534153
ADHD - Neuroinflammation and defective immunoregulation	Signal transducer and activator of transcription 6	STAT6	P42226	-1	[1] PMID: 24493267
ADHD - Neuroinflammation and defective immunoregulation	Interleukin-2	IL2	P60568	-1	[1] PMID: 24493267
ADHD - Neuroinflammation and defective immunoregulation	Nuclear factor NF-kappa-B p100 subunit	NFKB2	Q00653	1	[1] PMID: 21432611
ADHD - Neuroinflammation and defective immunoregulation	Pro-interleukin-16	IL16	Q14005	1	[1] PMID: 20534153
ADHD - Circadian system imbalance	Aryl hydrocarbon receptor nuclear translocator-like protein 1	ARNTL	O00327	-1	[1] PMID: 23876287
ADHD - Circadian system imbalance	Period circadian protein homolog 2	PER2	O15055	-1	[1] PMID: 23876287
ADHD - Circadian system imbalance	Circadian locomoter output cycles protein kaput	CLOCK	O15516	-1	[1] PMID: 23876287
ADHD - Circadian system imbalance	Period circadian protein homolog 1	PER1	O15534	-1	[1] PMID: 27836462
ADHD - Circadian system imbalance	Cryptochrome-1	CRY1	Q16526	-1	[1] PMID: 23876287
ADHD - Circadian system imbalance	Cryptochrome-2	CRY2	Q49AN0	-1	[1] PMID: 23876287
ADHD - Altered neural viability and neurodegeneration	G1/S-specific cyclin-D1	CCND1	P24385	-1	[1] PMID: 29608877
ADHD - Altered neural viability and neurodegeneration	Metabotropic glutamate receptor 8	GRM8	O00222	-1	[1] PMID: 29608877
ADHD - Altered neural viability and neurodegeneration	Forkhead box protein P2	FOXP2	O15409	-1	[1] PMID: 29608877
ADHD - Altered neural viability and neurodegeneration	E3 ubiquitin-protein ligase parkin	PRKN	O60260	-1	[1] PMID: 29608877
ADHD - Altered neural viability and neurodegeneration	Complement C5	C5	P01031	-1	[1] PMID: 21432611
ADHD - Altered neural viability and neurodegeneration	Interleukin-1 beta	IL1B	P01583	1	[1] PMID: 11803448
ADHD - Altered neural viability and neurodegeneration	C-reactive protein	CRP	P02741	1	[1] PMID: 21432611
ADHD - Altered neural viability and neurodegeneration	Protein S100-B	S100B	P04271	-1	[1] PMID: 21432611; [2] PMID: 20509936
ADHD - Altered neural viability and neurodegeneration	Interleukin-6	IL6	P05231	1	[1] PMID: 21432611
ADHD - Altered neural viability and neurodegeneration	Thyroid hormone receptor beta	THRB	P10828	-1	[1] PMID: 23681253
ADHD - Altered neural viability and neurodegeneration	Vitamin D3 receptor	VDR	P11473	-1	[1] PMID: 29497301
ADHD - Altered neural viability and neurodegeneration	Cyclic AMP-responsive element-binding protein 1	CREB1	P16220	-1	[1] PMID: 21432611
ADHD - Altered neural viability and neurodegeneration	cAMP-dependent protein kinase catalytic subunit alpha	PRKACA	P17612	-1	[1] PMID: 21432611
ADHD - Altered neural viability and neurodegeneration	Interleukin-1 receptor antagonist protein	IL1RN	P18510	-1	[1] PMID: 11803448
ADHD - Altered neural viability and neurodegeneration	Neurotrophin-3	NTF3	P20783	-1	[1] PMID: 21432611
ADHD - Altered neural viability and neurodegeneration	Neurofibromin	NF1	P21359	-1	[1] PMID: 26412966; [2] PMID: 25962619
ADHD - Altered neural viability and neurodegeneration	cAMP-dependent protein kinase catalytic subunit gamma	PRKACG	P22612	-1	[1] PMID: 21432611
ADHD - Altered neural viability and neurodegeneration	cAMP-dependent protein kinase catalytic subunit beta	PRKACB	P22694	-1	[1] PMID: 21432611
ADHD - Altered neural viability and neurodegeneration	Brain‐derived neurotrophic factor	BDNF	P23560	-1	[1] PMID: 30511754
ADHD - Altered neural viability and neurodegeneration	Ciliary neurotrophic factor receptor subunit alpha	CNTFR	P26992	-1	[1] PMID: 21432611
ADHD - Altered neural viability and neurodegeneration	Serum paraoxonase/arylesterase 1	PON1	P27169	-1	[1] PMID: 26886057
ADHD - Altered neural viability and neurodegeneration	Mitogen-activated protein kinase 3	MAPK3	P27361	1	[1] PMID: 21432611
ADHD - Altered neural viability and neurodegeneration	Nitric oxide synthase, brain	NOS1	P29475	-1	[1] PMID: 25621792; [2] PMID: 21724667; [3] PMID: 29608877; [4] PMID: 29608877
ADHD - Altered neural viability and neurodegeneration	Non-receptor tyrosine-protein kinase TYK2	TYK2	P29597	-1	[1] PMID: 21432611
ADHD - Altered neural viability and neurodegeneration	Cyclin-dependent kinase inhibitor 1	CDKN1A	P38936	1	[1] PMID: 29608877
ADHD - Altered neural viability and neurodegeneration	Glial cell line-derived neurotrophic factor	GDNF	P39905	1	[1] PMID: 27919646
ADHD - Altered neural viability and neurodegeneration	Metabotropic glutamate receptor 5	GRM5	P41594	-1	[1] PMID: 29608877
ADHD - Altered neural viability and neurodegeneration	Serine/threonine-protein kinase mTOR	MTOR	P42345	-1	[1] PMID: 25647412
ADHD - Altered neural viability and neurodegeneration	Nuclear receptor subfamily 4 group A member 2	NR4A2	P43354	-1	[1] PMID: 23876287
ADHD - Altered neural viability and neurodegeneration	Transcriptional coactivator YAP1	YAP1	P46937	-1	[1] PMID: 29608877
ADHD - Altered neural viability and neurodegeneration	Cadherin-13	CDH13	P55290	1	[1] PMID: 26460479
ADHD - Altered neural viability and neurodegeneration	POU domain, class 4, transcription factor 1	POU4F1	Q01851	-1	[1] PMID: 23876287
ADHD - Altered neural viability and neurodegeneration	Myocyte-specific enhancer factor 2C	MEF2C	Q06413	-1	[1] PMID: 29608877
ADHD - Altered neural viability and neurodegeneration	Metabotropic glutamate receptor 1	GRM1	Q13255	-1	[1] PMID: 29608877
ADHD - Altered neural viability and neurodegeneration	Metabotropic glutamate receptor 7	GRM7	Q14831	-1	[1] PMID: 29608877
ADHD - Altered neural viability and neurodegeneration	Mitogen-activated protein kinase 11	MAPK11	Q15759	-1	[1] PMID: 21432611
ADHD - Altered neural viability and neurodegeneration	BDNF/NT-3 growth factors receptor	NTRK2	Q16620	-1	[1] PMID: 25354496
ADHD - Altered neural viability and neurodegeneration	Sodium/hydrogen exchanger 9	SLC9A9	Q8IVB4	-1	[1] PMID: 29608877
ADHD - Altered neural viability and neurodegeneration	Adhesion G protein-coupled receptor L3	ADGRL3	Q9HAR2	-1	[1] PMID: 22939004; [2] PMID: 25989180
ADHD - Altered neural viability and neurodegeneration	ARF GTPase-activating protein GIT1	GIT1	Q9Y2X7	-1	[1] PMID: 21499268
DEPRESSION-HPA Axis Hyperactivation	Orexin	HCRT	O43612	-1	[1] PMID: 31612411 [2] PMID: 23657787
DEPRESSION-HPA Axis Hyperactivation	Orexin receptor type 1	HCRTR1	O43613	-1	[1] PMID: 31612411 [2] PMID: 23657787
DEPRESSION-HPA Axis Hyperactivation	Orexin receptor type 2	HCRTR2	O43614	-1	[1] PMID: 31612411 [2] PMID: 23657787
DEPRESSION-HPA Axis Hyperactivation	Tumor necrosis factor	TNF	P01375	1	PMID: 31228000
DEPRESSION-HPA Axis Hyperactivation	Corticoliberin	CRH	P06850	1	PMID: 30028316
DEPRESSION-HPA Axis Hyperactivation	Brain-derived neurotrophic factor	BDNF	P23560	-1	PMID: 20923424
DEPRESSION-HPA Axis Hyperactivation	Caspase-1	CASP1	P29466	1	PMID: 26711676
DEPRESSION-HPA Axis Hyperactivation	BDNF/NT-3 growth factors receptor	NTRK2	Q16620	-1	PMID: 20923424
DEPRESSION-HPA Axis Hyperactivation	Pro-opiomelanocortin	POMC	P01189	1	PMID: 30028316
DEPRESSION-HPA Axis Hyperactivation	Glucocorticoid receptor	NR3C1	P04150	-1	[1] PMID: 30306457 [2] PMID: 30278546
DEPRESSION-HPA Axis Hyperactivation	Corticotropin-releasing factor receptor 1	CRHR1	P34998	1	PMID: 24123648
DEPRESSION-HPA Axis Hyperactivation	Corticotropin-releasing factor receptor 2	CRHR2	Q13324	1	PMID: 24123648
DEPRESSION-HPA Axis Hyperactivation	Peptidyl-prolyl cis-trans isomerase FKBP5	FKBP5	Q13451	-1	PMID: 24040820
DEPRESSION-HPA Axis Hyperactivation	Dendritic cell nuclear protein 1	DCANP1	Q8TF63	1	PMID: 28041597
DEPRESSION-Neuroinflammation	Tumor necrosis factor	TNF	P01375	1	PMID: 31612411
DEPRESSION-Neuroinflammation	Interferon gamma	IFNG	P01579	1	[1] PMID: 26442697 [2] PMID: 30524702 [3] PMID: 30306457
DEPRESSION-Neuroinflammation	Interleukin-1 beta	IL1B	P01584	1	PMID: 31612411
DEPRESSION-Neuroinflammation	Corticoliberin	CRH	P06850	1	PMID: 29907890
DEPRESSION-Neuroinflammation	Fibroblast growth factor 2	FGF2	P09038	-1	PMID: 30804785
DEPRESSION-Neuroinflammation	Indoleamine 2,3-dioxygenase 1	IDO1	P14902	1	PMID: 31228000
DEPRESSION-Neuroinflammation	Nuclear factor NF-kappa-B p105 subunit	NFKB1	P19838	1	[1] PMID: 26348786 [2] PMID: 20133768
DEPRESSION-Neuroinflammation	Caspase-1	CASP1	P29466	1	PMID: 26711676
DEPRESSION-Neuroinflammation	Peroxisome proliferator-activated receptor gamma coactivator 1-alpha	PPARGC1A	Q9UBK2	-1	PMID: 31228000
DEPRESSION-Neuroinflammation	Toll-like receptor 4	TLR4	O00206	1	PMID: 26442697
DEPRESSION-Neuroinflammation	Mothers against decapentaplegic homolog 7	SMAD7	O15105	1	PMID: 29438781
DEPRESSION-Neuroinflammation	Toll-like receptor 2	TLR2	O60603	1	PMID: 29294244
DEPRESSION-Neuroinflammation	Interleukin-1 alpha	IL1A	P01583	1	[1] PMID: 30306457 [2] PMID: 31228000
DEPRESSION-Neuroinflammation	C-reactive protein	CRP	P02741	1	PMID: 29764522
DEPRESSION-Neuroinflammation	Interleukin-4	IL4	P05112	-1	PMID: 26711676
DEPRESSION-Neuroinflammation	Interleukin-6	IL6	P05231	1	PMID: 31612411
DEPRESSION-Neuroinflammation	72 kDa type IV collagenase	MMP2	P08253	-1	[1] PMID: 29438781 [2] PMID: 27098106
DEPRESSION-Neuroinflammation	Growth-regulated alpha protein	CXCL1	P09341	1	PMID: 26711676
DEPRESSION-Neuroinflammation	High mobility group protein B1	HMGB1	P09429	1	PMID: 26442697
DEPRESSION-Neuroinflammation	Interleukin-8	CXCL8	P10145	1	PMID: 31612411
DEPRESSION-Neuroinflammation	C-C motif chemokine 2	CCL2	P13500	1	PMID: 26711676
DEPRESSION-Neuroinflammation	Integrin alpha-4	ITGA4	P13612	1	PMID: 26711676
DEPRESSION-Neuroinflammation	Matrix metalloproteinase-9	MMP9	P14780	1	[1] PMID: 29438781 [2] PMID: 27098106
DEPRESSION-Neuroinflammation	Metalloproteinase inhibitor 2	TIMP2	P16035	-1	PMID: 27098106
DEPRESSION-Neuroinflammation	P-selectin	SELP	P16109	1	PMID: 26711676
DEPRESSION-Neuroinflammation	Prostaglandin G/H synthase 2, EC 1.14.99.1	PTGS2	P35354	1	PMID: 28566947
DEPRESSION-Neuroinflammation	TGF-beta receptor type-1	TGFBR1	P36897	-1	PMID: 29438781
DEPRESSION-Neuroinflammation	TGF-beta receptor type-2	TGFBR2	P37173	-1	PMID: 29438781
DEPRESSION-Neuroinflammation	Signal transducer and activator of transcription 1-alpha/beta	STAT1	P42224	1	PMID: 30306457
DEPRESSION-Neuroinflammation	Interleukin-2	IL2	P60568	1	PMID: 31228000
DEPRESSION-Neuroinflammation	Mothers against decapentaplegic homolog 4	SMAD4	Q13485	-1	PMID: 29438781
DEPRESSION-Neuroinflammation	Interleukin-18	IL18	Q14116	1	PMID: 26711676
DEPRESSION-Neuroinflammation	Beclin-1	BECN1	Q14457	-1	PMID: 29438781
DEPRESSION-Neuroinflammation	Mothers against decapentaplegic homolog 2	SMAD2	Q15796	-1	PMID: 29438781
DEPRESSION-Neuroinflammation	NACHT, LRR and PYD domains-containing protein 3	NLRP3	Q96P20	1	PMID: 31612411
DEPRESSION-Neuroinflammation	Interleukin-37	IL37	Q9NZH6	-1	PMID: 29907890
DEPRESSION-Neuroinflammation	Apoptosis-associated speck-like protein containing a CARD	PYCARD	Q9ULZ3	1	PMID: 30306457
DEPRESSION-Neuroinflammation	Heat shock protein 72	HSP70-1	Q9UQC1	1	PMID: 29294244
DEPRESSION-Oxidative Stress	Superoxide dismutase [Cu-Zn]	SOD1	P00441	1/-1	[1] PMID: 29294244 [2] PMID: 26348786 [3] DOI: 10.1155/2015/898393
DEPRESSION-Oxidative Stress	Catalase	CAT	P04040	1	[1] PMID: 29294244 [2] PMID: 29294244
DEPRESSION-Oxidative Stress	Superoxide dismutase [Mn], mitochondrial	SOD2	P04179	1/-1	[1] PMID: 29294244 [2] PMID: 26348786 [3] DOI: 10.1155/2015/898393
DEPRESSION-Oxidative Stress	Glutathione peroxidase 1	GPX1	P07203	-1	[1] PMID: 26348786 [2] DOI: 10.1155/2015/898393
DEPRESSION-Oxidative Stress	Extracellular superoxide dismutase [Cu-Zn]	SOD3	P08294	1/-1	[1] PMID: 29294244 [2] PMID: 26348786 [3] DOI: 10.1155/2015/898393
DEPRESSION-Oxidative Stress	Glutathione peroxidase 2	GPX2	P18283	-1	[1] PMID: 26348786 [2] DOI: 10.1155/2015/898393
DEPRESSION-Oxidative Stress	Glutathione peroxidase 3	GPX3	P22352	-1	[1] PMID: 26348786 [2] DOI: 10.1155/2015/898393
DEPRESSION-Oxidative Stress	Serum paraoxonase/arylesterase 1, PON 1	PON1	P27169	-1	PMID: 26348786
DEPRESSION-Oxidative Stress	Kelch-like ECH-associated protein 1	KEAP1	Q14145	1	PMID: 31612411
DEPRESSION-Oxidative Stress	Nuclear factor erythroid 2-related factor 2	NFE2L2	Q16236	-1	PMID: 31612411
DEPRESSION-Oxidative Stress	Coenzyme Q-binding protein COQ10 homolog A, mitochondrial	COQ10A	Q96MF6	-1	PMID:30083112
DEPRESSION-Loss of Neural Plasticity and Neurogenesis	Fibroblast growth factor 2	FGF2	P09038	-1	PMID: 29961124
DEPRESSION-Loss of Neural Plasticity and Neurogenesis	Nuclear factor NF-kappa-B p105 subunit	NFKB1	P19838	-1	PMID: 26037806
DEPRESSION-Loss of Neural Plasticity and Neurogenesis	Brain-derived neurotrophic factor	BDNF	P23560	-1	[1] PMID: 30140973 [2] PMID: 26711676
DEPRESSION-Loss of Neural Plasticity and Neurogenesis	Glutamate receptor ionotropic, NMDA 2A, GluN2A	GRIN2A	Q12879	1	PMID: 26711676
DEPRESSION-Loss of Neural Plasticity and Neurogenesis	Glutamate receptor ionotropic, NMDA 2B, GluN2B	GRIN2B	Q13224	1	PMID: 26711676
DEPRESSION-Loss of Neural Plasticity and Neurogenesis	BDNF/NT-3 growth factors receptor	NTRK2	Q16620	-1	PMID: 30140973
DEPRESSION-Loss of Neural Plasticity and Neurogenesis	Vascular endothelial growth factor receptor 1	FLT1	P17948	-1	PMID: 29961124
DEPRESSION-Loss of Neural Plasticity and Neurogenesis	Vascular endothelial growth factor receptor 2	KDR	P35968	-1	PMID: 29961124
DEPRESSION-Loss of Neural Plasticity and Neurogenesis	Eukaryotic elongation factor 2 kinase	EEF2K	O00418	-1	PMID: 30140973
DEPRESSION-Loss of Neural Plasticity and Neurogenesis	Protein Wnt-4	WNT4	O14905	-1	PMID: 26037806
DEPRESSION-Loss of Neural Plasticity and Neurogenesis	Inhibitor of nuclear factor kappa-B kinase subunit beta	IKBKB	O14920	1	PMID: 26037806
DEPRESSION-Loss of Neural Plasticity and Neurogenesis	Gamma-aminobutyric acid type B receptor subunit 2	GABBR2	O75899	1	PMID: 29175713
DEPRESSION-Loss of Neural Plasticity and Neurogenesis	Tissue-type plasminogen activator	PLAT	P00750	-1	PMID: 29348903
DEPRESSION-Loss of Neural Plasticity and Neurogenesis	Plasminogen activator inhibitor 1	SERPINE1	P05121	1	PMID: 29348904
DEPRESSION-Loss of Neural Plasticity and Neurogenesis	Fibroblast growth factor 1	FGF1	P05230	-1	PMID: 29961124
DEPRESSION-Loss of Neural Plasticity and Neurogenesis	Fibroblast growth factor receptor 1	FGFR1	P11362	1	PMID: 23040813
DEPRESSION-Loss of Neural Plasticity and Neurogenesis	Elongation factor 2	EEF2	P13639	-1	PMID: 30140973
DEPRESSION-Loss of Neural Plasticity and Neurogenesis	Beta-3 adrenergic receptor	ADRB3	P13945	-1	PMID: 30028316
DEPRESSION-Loss of Neural Plasticity and Neurogenesis	Vascular endothelial growth factor A	VEGFA	P15692	-1	PMID: 29961124
DEPRESSION-Loss of Neural Plasticity and Neurogenesis	Cyclic AMP-responsive element-binding protein 1	CREB1	P16220	-1	PMID: 30028316
DEPRESSION-Loss of Neural Plasticity and Neurogenesis	1-phosphatidylinositol 4,5-bisphosphate phosphodiesterase gamma-2	PLCG2	P16885	-1	PMID: 29961124
DEPRESSION-Loss of Neural Plasticity and Neurogenesis	cAMP-dependent protein kinase catalytic subunit alpha	PRKACA	P17612	-1	PMID: 30028316
DEPRESSION-Loss of Neural Plasticity and Neurogenesis	1-phosphatidylinositol 4,5-bisphosphate phosphodiesterase gamma-1	PLCG1	P19174	-1	PMID: 29961124
DEPRESSION-Loss of Neural Plasticity and Neurogenesis	cAMP-dependent protein kinase catalytic subunit beta	PRKACB	P22694	-1	PMID: 30028316
DEPRESSION-Loss of Neural Plasticity and Neurogenesis	Ribosomal protein S6 kinase beta-1	RPS6KB1	P23443	-1	PMID: 30140973
DEPRESSION-Loss of Neural Plasticity and Neurogenesis	Catenin beta-1	CTNNB1	P35222	-1	PMID: 26037806
DEPRESSION-Loss of Neural Plasticity and Neurogenesis	Glial cell line-derived neurotrophic factor	GDNF	P39905	-1	PMID: 29961124
DEPRESSION-Loss of Neural Plasticity and Neurogenesis	Glutamate receptor 1	GRIA1	P42261	1	PMID: 27144355
DEPRESSION-Loss of Neural Plasticity and Neurogenesis	Glutamate receptor 2	GRIA2	P42262	1	PMID: 27144355
DEPRESSION-Loss of Neural Plasticity and Neurogenesis	Serine/threonine-protein kinase mTOR	MTOR	P42345	-1	PMID: 30140973
DEPRESSION-Loss of Neural Plasticity and Neurogenesis	G protein-activated inward rectifier potassium channel 2	KCNJ6	P48051	1	PMID: 29175713
DEPRESSION-Loss of Neural Plasticity and Neurogenesis	Tuberin	TSC2	P49815	1	PMID: 30140973
DEPRESSION-Loss of Neural Plasticity and Neurogenesis	Glycogen synthase kinase-3 alpha	GSK3A	P49840	1	PMID: 30140973
DEPRESSION-Loss of Neural Plasticity and Neurogenesis	Glycogen synthase kinase-3 beta	GSK3B	P49841	1	[1] PMID: 26037806 [2] PMID: 26995153 [3] PMID: 30140973
DEPRESSION-Loss of Neural Plasticity and Neurogenesis	Ras-related C3 botulinum toxin substrate 1	RAC1	P63000	-1	PMID: 26037806
DEPRESSION-Loss of Neural Plasticity and Neurogenesis	Calcium/calmodulin-dependent protein kinase type II subunit beta	CAMK2B	Q13554	-1	PMID: 29175713
DEPRESSION-Loss of Neural Plasticity and Neurogenesis	Serine/threonine-protein phosphatase 2A activator	PTPA	Q15257	1	PMID: 29175713
DEPRESSION-Loss of Neural Plasticity and Neurogenesis	Regulatory-associated protein of mTOR	RPTOR	Q8N122	-1	PMID: 30140973
DEPRESSION-Loss of Neural Plasticity and Neurogenesis	DEP domain-containing mTOR-interacting protein	DEPTOR	Q8TB45	-1	PMID: 30140973
DEPRESSION-Loss of Neural Plasticity and Neurogenesis	Hamartin	TSC1	Q92574	1	PMID: 30140973
DEPRESSION-Loss of Neural Plasticity and Neurogenesis	BAG family molecular chaperone regulator 1	BAG1	Q99933	-1	[1] PMID: 26442697 [2] PMID:18562287
DEPRESSION-Loss of Neural Plasticity and Neurogenesis	Target of rapamycin complex subunit LST8	MLST8	Q9BVC4	-1	PMID: 30140973
DEPRESSION-Loss of Neural Plasticity and Neurogenesis	Ribosomal protein S6 kinase beta-2	RPS6KB2	Q9UBS0	-1	PMID: 30140973
DEPRESSION-Loss of Neural Plasticity and Neurogenesis	Gamma-aminobutyric acid type B receptor subunit 1	GABBR1	Q9UBS5	1	PMID: 29175713
DEPRESSION-Glutamatergic Excitotoxicity	Indoleamine 2,3-dioxygenase 1	IDO1	P14902	1	PMID: 30140973
DEPRESSION-Glutamatergic Excitotoxicity	Glutamate receptor ionotropic, NMDA 2A, GluN2A	GRIN2A	Q12879	1	PMID: 26711676
DEPRESSION-Glutamatergic Excitotoxicity	Glutamate receptor ionotropic, NMDA 2B, GluN2B	GRIN2B	Q13224	1	PMID: 26711676
DEPRESSION-Glutamatergic Excitotoxicity	Peroxisome proliferator-activated receptor gamma coactivator 1-alpha	PPARGC1A	Q9UBK2	-1	PMID: 31228000
DEPRESSION-Glutamatergic Excitotoxicity	Glutamine synthetase	GLUL	P15104	-1	PMID: 21827775
DEPRESSION-Glutamatergic Excitotoxicity	Excitatory amino acid transporter 1	SLC1A3	P43003	-1	[1] PMID: 21827775 [2] PMID: 22371047
DEPRESSION-Glutamatergic Excitotoxicity	Excitatory amino acid transporter 2	SLC1A2	P43004	-1	[1] PMID: 21827775 [2] PMID: 22371047
DEPRESSION-Glutamatergic Excitotoxicity	BH3-interacting domain death agonist	BID	P55957	1	PMID: 26684792
DEPRESSION-Glutamatergic Excitotoxicity	Synaptosomal-associated protein 25	SNAP25	P60880	1	PMID: 21689704
DEPRESSION-Glutamatergic Excitotoxicity	Vesicle-associated membrane protein 2	VAMP2	P63027	1	PMID: 21689704
DEPRESSION-Glutamatergic Excitotoxicity	Peroxisome proliferator-activated receptor delta, PPAR-delta	PPARD	Q03181	-1	PMID: 31228000
DEPRESSION-Glutamatergic Excitotoxicity	Peroxisome proliferator-activated receptor alpha, PPAR-alpha	PPARA	Q07869	-1	PMID: 31228000
DEPRESSION-Glutamatergic Excitotoxicity	Syntaxin-1A	STX1A	Q16623	1	PMID: 21689704
DEPRESSION-Glutamatergic Excitotoxicity	Kinase suppressor of Ras 2	KSR2	Q6VAB6	1	PMID: 26684792
DEPRESSION-Glutamatergic Excitotoxicity	Kinase suppressor of Ras 1	KSR1	Q8IVT5	1	PMID: 26684792
DEPRESSION-Glutamatergic Excitotoxicity	Kynurenine/alpha-aminoadipate aminotransferase, mitocondrial	AADAT	Q8N5Z0	-1	PMID: 31228000
DEPRESSION-Glutamatergic Excitotoxicity	Bcl2-associated agonist of cell death	BAD	Q92934	1	PMID: 26684792
DEPRESSION-Glutamatergic Excitotoxicity	Calcium/calmodulin-dependent protein kinase type II subunit alpha	CAMK2A	Q9UQM7	1	PMID: 21689704
DEPRESSION-Neurotransmission Alteration	Orexin	HCRT	O43612	-1	[1] PMID: 31612411 [2] PMID: 23657787
DEPRESSION-Neurotransmission Alteration	Orexin receptor type 1	HCRTR1	O43613	-1	[1] PMID: 31612411 [2] PMID: 23657787
DEPRESSION-Neurotransmission Alteration	Orexin receptor type 2	HCRTR2	O43614	-1	[1] PMID: 31612411 [2] PMID: 23657787
DEPRESSION-Neurotransmission Alteration	Tumor necrosis factor	TNF	P01375	1	PMID: 30524702
DEPRESSION-Neurotransmission Alteration	Interferon gamma	IFNG	P01579	1	[1] PMID: 26442697 [2] PMID: 30524702 [3] PMID: 30306457
DEPRESSION-Neurotransmission Alteration	Interleukin-1 beta	IL1B	P01584	1	PMID: 30524702
DEPRESSION-Neurotransmission Alteration	Indoleamine 2,3-dioxygenase 1	IDO1	P14902	1	PMID: 31228000
DEPRESSION-Neurotransmission Alteration	5-hydroxytryptamine receptor 3B	HTR3B	O95264	1	PMID: 30144453
DEPRESSION-Neurotransmission Alteration	5-hydroxytryptamine receptor 1A	HTR1A	P08908	1/-1	PMID: 30144453
DEPRESSION-Neurotransmission Alteration	Alpha-2A adrenergic receptor	ADRA2A	P08913	1	PMID: 30028316
DEPRESSION-Neurotransmission Alteration	D(2) dopamine receptor	DRD2	P14416	1	[1] PMID: 29106542 [2] PMID: 26431907
DEPRESSION-Neurotransmission Alteration	Interferon gamma receptor 1	IFNGR1	P15260	1	PMID: 30306457
DEPRESSION-Neurotransmission Alteration	Alpha-2B adrenergic receptor	ADRA2B	P18089	1	PMID: 30028316
DEPRESSION-Neurotransmission Alteration	Alpha-2C adrenergic receptor	ADRA2C	P18825	1	PMID: 30028316
DEPRESSION-Neurotransmission Alteration	Amine oxidase [flavin-containing] A	MAOA	P21397	1	PMID: 31612411
DEPRESSION-Neurotransmission Alteration	D(1A) dopamine receptor	DRD1	P21728	1	PMID: 26431907
DEPRESSION-Neurotransmission Alteration	Sodium-dependent noradrenaline transporter	SLC6A2	P23975	1	PMID: 26711676
DEPRESSION-Neurotransmission Alteration	5-hydroxytryptamine receptor 1B	HTR1B	P28222	1/-1	PMID: 30144453
DEPRESSION-Neurotransmission Alteration	Sodium-dependent serotonin transporter	SLC6A4	P31645	1	PMID: 26711676
DEPRESSION-Neurotransmission Alteration	5-hydroxytryptamine receptor 7	HTR7	P34969	1	PMID: 28646910
DEPRESSION-Neurotransmission Alteration	Nitric oxide synthase, inducible	NOS2	P35228	1	PMID: 30306457
DEPRESSION-Neurotransmission Alteration	D(3) dopamine receptor	DRD3	P35462	1	PMID: 29106542
DEPRESSION-Neurotransmission Alteration	Interferon gamma receptor 2	IFNGR2	P38484	1	PMID: 30306457
DEPRESSION-Neurotransmission Alteration	5-hydroxytryptamine receptor 2B	HTR2B	P41595	-1	PMID: 30144453
DEPRESSION-Neurotransmission Alteration	5-hydroxytryptamine receptor 3A	HTR3A	P46098	1	PMID: 30144453
DEPRESSION-Neurotransmission Alteration	5-hydroxytryptamine receptor 5A	HTR5A	P47898	1	PMID: 30144453
DEPRESSION-Neurotransmission Alteration	Tryptophan 2,3-dioxygenase	TDO	P48775	1	PMID: 28566947
DEPRESSION-Neurotransmission Alteration	Protein S100-A10	S100A10	P60903	-1	PMID: 26037806
DEPRESSION-Neurotransmission Alteration	Sodium-dependent dopamine transporter	SLC6A3	Q01959	1	PMID: 26711676
DEPRESSION-Neurotransmission Alteration	Synaptic vesicular amine transporter	SLC18A2	Q05940	-1	PMID: 27496183
DEPRESSION-Neurotransmission Alteration	5-hydroxytryptamine receptor 4	HTR4	Q13639	-1	PMID: 28646910
ANXIETY-HPA Axis Hyperactivation	Orexin	HCRT	O43612	1	PMID: 22813973
ANXIETY-HPA Axis Hyperactivation	Proto-oncogene c-Fos	FOS	P01100	1	PMID: 18616985
ANXIETY-HPA Axis Hyperactivation	Tumor necrosis factor	TNF	P01375	1	PMID: 30564830
ANXIETY-HPA Axis Hyperactivation	Interleukin-6	IL6	P05231	1	PMID: 29511710
ANXIETY-HPA Axis Hyperactivation	Cholecystokinin	CCK	P06307	1	PMID: 22553078
ANXIETY-HPA Axis Hyperactivation	5-hydroxytryptamine receptor 1A	HTR1A	P08908	1	[1]PMID: 24835117 [2]PMID: 1977479
ANXIETY-HPA Axis Hyperactivation	Corticotropin-releasing factor receptor 1	CRHR1	P34998	1	PMID: 22033745
ANXIETY-HPA Axis Hyperactivation	Nestafin-1	NUCB2	P80303	1	PMID: 29253527
ANXIETY-HPA Axis Hyperactivation	Orexin receptor type 1	HCRTR1	O43613	1	[1]PMID: 22813973 [2] PMID: 26696848
ANXIETY-HPA Axis Hyperactivation	Orexin receptor type 2	HCRTR2	O43614	1	[1]PMID: 22813973 [2] PMID: 26696848
ANXIETY-HPA Axis Hyperactivation	Vasopressin-neurophysin 2-copeptin	AVP	P01185	1	[1]PMID: 19560279 [2]PMID: 25762210 [3]PMID: P01185 [4]PMID: 19625690
ANXIETY-HPA Axis Hyperactivation	Pro-opiomelanocortin	POMC	P01189	1	[1]PMID: 25014196 [2]PMID: 10599479 [3]PMID: 22813973
ANXIETY-HPA Axis Hyperactivation	Somatotropin	GH1	P01241	1	[1]PMID: 30564830 [2]PMID: 16879003
ANXIETY-HPA Axis Hyperactivation	Pro-neuropeptide Y	NPY	P01303	1	PMID: 22429904
ANXIETY-HPA Axis Hyperactivation	Glucocorticoid receptor	NR3C1	P04150	1	[1]PMID: 28061969 [2] PMID: 10599479 [3]PMID: 25762210
ANXIETY-HPA Axis Hyperactivation	Corticotropin Releasing Hormone	CRF	P06850	1	[1]PMID: 18616985 [2]PMID: 19560279 [2]PMID: 8491091 [4]PMID: 18616985
ANXIETY-HPA Axis Hyperactivation	Mineralocorticoid receptor	NR3C2	P08235	1	PMID: 17360585
ANXIETY-HPA Axis Hyperactivation	Neuropeptide S	NPS	P0C0P6	-1	PMID: 19339610 [2]PMID: 10213797 [3]10822340 [4]8940412 [5]10823952 [6]10341356 [7]3008937
ANXIETY-HPA Axis Hyperactivation	Cannabinoid receptor 1	CNR1	P21554	-1	PMID: 23647582
ANXIETY-HPA Axis Hyperactivation	Nitric oxide synthase, brain	NOS1	P29475	1	PMID: 28061969
ANXIETY-HPA Axis Hyperactivation	Vasopressin V1a receptor	AVPR1A	P37288	1	PMID: 18508119
ANXIETY-HPA Axis Hyperactivation	Leptin	LEP	P41159	1	PMID: 30564830
ANXIETY-HPA Axis Hyperactivation	Vasopressin V1b receptor	AVPR1B	P47901	1	[1]PMID: 22911682 [2]PMID: 18508119
ANXIETY-HPA Axis Hyperactivation	Neuropeptide Y receptor type 2	NPY2R	P49146	1	PMID: 29391390
ANXIETY-HPA Axis Hyperactivation	Urocortin	UCN	P55089	1	[1]PMID: 12437941 [2]PMID: 29253527
ANXIETY-HPA Axis Hyperactivation	Period circadian protein homolog 3	PER3	P56645	1	[1]PMID: 31249322 [2]PMID: 28860482 [3]PMID: 31249322
ANXIETY-HPA Axis Hyperactivation	Adrenocorticotropic hormone	ACTH	Q01718	1	PMID: 19560279
ANXIETY-HPA Axis Hyperactivation	Corticotropin-releasing factor receptor 2	CRHR2	Q13324	-1	PMID: 18706413
ANXIETY-HPA Axis Hyperactivation	Peptidyl-prolyl cis-trans isomerase FKBP5	FKBP5	Q13451	1	[1]PMID: 19560279 [2]PMID: 25762210
ANXIETY-HPA Axis Hyperactivation	Metastasis-suppressor KiSS-1	KISS1	Q15726	1	[1]PMID: 23219969 [2]PMID: 29253527
ANXIETY-HPA Axis Hyperactivation	Gamma-aminobutyric acid receptor subunit alpha-6	GABRA6	Q16445	1	[1]PMID: 19842164 [2]PMID: 29018204
ANXIETY-HPA Axis Hyperactivation	Neuropeptide S receptor	NPSR1	Q6W5P4	1	PMID: 31132388
ANXIETY-HPA Axis Hyperactivation	Urocortin-3	UCN3	Q969E3	1	[1]PMID: 12437941 [2]PMID: 29253527
ANXIETY-HPA Axis Hyperactivation	Urocortin-2	UCN2	Q96RP3	1	[1]PMID: 12437941 [2]PMID: 29253527
ANXIETY-HPA Axis Hyperactivation	Spexin	SPX	Q9BT56	-1	[1]PMID: 31133851 [2]PMID: 31275244 [3]PMID: 29488100
ANXIETY-HPA Axis Hyperactivation	Apelin	APEL	Q9ULZ1	-1	[1]PMID: 29680708 [2]PMID: 19395447
ANXIETY-Neuroinflammation	Glutathione reductase, mitochondrial	GSR1	P00390	-1	PMID: 24669207
ANXIETY-Neuroinflammation	Lactoylglutathione lyase	GLO1	Q04760	-1	PMID: 24669207
ANXIETY-Neuroinflammation	Nitric oxide synthase, inducible	NOS2	P35228	1	PMID: 29173175
ANXIETY-Neuroinflammation	Epididymal secretory glutathione peroxidase	GPX5	O75715	-1	PMID: 24669207
ANXIETY-Neuroinflammation	Superoxide dismutase [Cu-Zn]	SOD1	P00441	-1	PMID: 24669207
ANXIETY-Neuroinflammation	Superoxide dismutase [Mn]	SOD2	P04179	-1	PMID: 24669207
ANXIETY-Neuroinflammation	Glutathione peroxidase 1	GPX1	P07203	-1	PMID: 24669207
ANXIETY-Neuroinflammation	Extracellular superoxide dismutase [Cu-Zn]	SOD3	P08294	-1	PMID: 24669207
ANXIETY-Neuroinflammation	Glutathione peroxidase 2	GPX2	P18283	-1	PMID: 24669207
ANXIETY-Neuroinflammation	Glutathione peroxidase 3	GPX3	P22352	-1	PMID: 24669207
ANXIETY-Neuroinflammation	SHC-transforming protein 1	SHC1	P29353	1	PMID: 24669207
ANXIETY-Neuroinflammation	Phospholipid hydroperoxide glutathione peroxidase	GPX4	P36969	-1	PMID: 24669207
ANXIETY-Neuroinflammation	Glutathione peroxidase 6	GPX6	P59796	-1	PMID: 24669207
ANXIETY-Neuroinflammation	Glutathione peroxidase 7	GPX7	Q96SL4	-1	PMID: 24669207
ANXIETY-Oxidative Stress	Tumor necrosis factor	TNF	P01375	1	PMID: 23415758
ANXIETY-Oxidative Stress	Interferon Gamma	IFNG	P01579	1	[1]PMID: 11817214 [2]PMID: 28757328 [3]PMID: 9617578
ANXIETY-Oxidative Stress	Interleukin-6	IL6	P05231	1	PMID: 29511710
ANXIETY-Oxidative Stress	Calcium/calmodulin-dependent protein kinase type IV	CAMK4	Q16566	-1	[1]PMID: 18386176 [2]PMID: 24096214
ANXIETY-Oxidative Stress	Circadian locomoter output cycles protein kaput	CLOCK	O15516	-1	PMID: 27103936
ANXIETY-Oxidative Stress	Rho-associated protein kinase 2	ROCK2	O75116	1	PMID: 31302146
ANXIETY-Oxidative Stress	Interleukin-1 beta	IL1B	P01584	1	PMID: 31195034
ANXIETY-Oxidative Stress	C-reactive protein	CRP	P02741	-1	PMID: 29173175
ANXIETY-Oxidative Stress	C-X-C motif chemokine 10	CXCL10	P02778	1	[1]PMID: 29511710; [2] PMID: 32217347
ANXIETY-Oxidative Stress	Interleukin-4	IL4	P05112	-1	PMID: 30963194
ANXIETY-Oxidative Stress	Galectin-2	GAL2	P05162	-1	PMID: 26907960
ANXIETY-Oxidative Stress	Interleukin-8	CXCL8	P10145	1	[1]PMID: 29511710; [2] PMID: 32217347
ANXIETY-Oxidative Stress	C-C motif chemokine 2	CCL2	P13500	1	[1]PMID: 29511710; [2] PMID: 32217347
ANXIETY-Oxidative Stress	C-C motif chemokine 5	CCL5	P13501	1	[1]PMID: 29511710; [2] PMID: 32217347
ANXIETY-Oxidative Stress	Galectin-3	LGALS3	P17931	-1	[1]PMID: 30682502 [2]PMID: 16458432 [3]PMID: 26907960
ANXIETY-Oxidative Stress	Interleukin-10	IL10	P22301	-1	PMID: 31195034
ANXIETY-Oxidative Stress	Mitogen-activated protein kinase 3	MAPK3	P27361	1	[1]PMID: 28158734 [2]PMID: 23427082 [3]PMID: 24096214
ANXIETY-Oxidative Stress	Mitogen-activated protein kinase 1	MAPK1	P28482	1	[1]PMID: 28158734 [2]PMID: 23427082 [3]PMID: 24096214
ANXIETY-Oxidative Stress	Eotaxin	CCL11	P51671	1	[1]PMID: 29511710; [2] PMID: 32217347
ANXIETY-Oxidative Stress	Nuclear factor NF-kappa-B p100 subunit	NFKB2	Q00653	1	PMID: 25249351
ANXIETY-Oxidative Stress	Rho-associated protein kinase 1	ROCK1	Q13464	1	PMID: 31302146
ANXIETY-Oxidative Stress	Interleukin-17A	IL17A	Q16552	1	PMID: 22462422
ANXIETY-Oxidative Stress	Methylcytosine dioxygenase TET1	TET1	Q8NFU7	1	[1]PMID: 28899881 [2]PMID: 30584981
ANXIETY-Oxidative Stress	NAD-dependent protein deacetylase sirtuin-1	SIRT1	Q96EB6	-1	[1]PMID: 29680708 [2]PMID: 28346398
ANXIETY-Oxidative Stress	C-C motif chemokine 27	CCL27	Q9Y4X3	1	PMID: 29511710
ANXIETY-Neurodevelopment Deviation and Maintenance Failure	Glutathione reductase, mitochondrial	GSR	P00390	-1	PMID: 23596160
ANXIETY-Neurodevelopment Deviation and Maintenance Failure	Proto-oncogene c-Fos	FOS	P01100	1	PMID: 28061969
ANXIETY-Neurodevelopment Deviation and Maintenance Failure	Lactoylglutathione lyase	GLO1	Q04760	-1	PMID: 23596160
ANXIETY-Neurodevelopment Deviation and Maintenance Failure	Receptor tyrosine-protein kinase erbB-4	ERBB4	Q15303	-1	[1]PMID: 25308353 [2]PMID: 30083275
ANXIETY-Neurodevelopment Deviation and Maintenance Failure	Calcium/calmodulin-dependent protein kinase type IV	CAMK4	Q16566	-1	PMID: 18386176
ANXIETY-Neurodevelopment Deviation and Maintenance Failure	Glutamate receptor ionotropic, NMDA 2D	GRIN2D	O15399	-1	PMID: 19460458
ANXIETY-Neurodevelopment Deviation and Maintenance Failure	Cyclic AMP-responsive element-binding protein 3	CREB3	O43889	-1	[1]PMID: 18386176 [2]PMID: 18053176 [3]PMID: 30822517
ANXIETY-Neurodevelopment Deviation and Maintenance Failure	Guanine nucleotide-binding protein G(I)/G(S)/G(O) subunit gamma-7	GNG7	O60262	-1	PMID: 29391390
ANXIETY-Neurodevelopment Deviation and Maintenance Failure	PH domain leucine-rich repeat-containing protein phosphatase 1	SCOP	O60346	1	PMID: 27640726
ANXIETY-Neurodevelopment Deviation and Maintenance Failure	Glutamate receptor ionotropic, NMDA 3B	GRIN3B	O60391	-1	PMID: 19460458
ANXIETY-Neurodevelopment Deviation and Maintenance Failure	GTPase KRas	KRAS	P01116	-1	PMID: 25157566
ANXIETY-Neurodevelopment Deviation and Maintenance Failure	Beta-nerve growth factor	NGF	P01138	-1	PMID: 24993299
ANXIETY-Neurodevelopment Deviation and Maintenance Failure	Insulin-like growth factor I	IGF1	P05019	-1	PMID: 22829957
ANXIETY-Neurodevelopment Deviation and Maintenance Failure	Tumor necrosis factor receptor superfamily member 16	NGFR	P08138	-1	[1]PMID: 21978521 [2]PMID: 20179086
ANXIETY-Neurodevelopment Deviation and Maintenance Failure	Cyclic AMP-responsive element-binding protein 1	CREB1	P16220	-1	[1]PMID: 18386176 [2]PMID: 18053176 [3]PMID: 30822517
ANXIETY-Neurodevelopment Deviation and Maintenance Failure	cAMP-dependent protein kinase catalytic subunit alpha	PRKACA	P17612	-1	[1] PMID: 22024111; [2] PMID: 27445986
ANXIETY-Neurodevelopment Deviation and Maintenance Failure	Early growth response protein 1	EGR1	P18146	1	[1]PMID: 28321184; [2]PMID: 28321184
ANXIETY-Neurodevelopment Deviation and Maintenance Failure	Nuclear factor NF-kappa-B p105 subunit	NFKB	P19838	1	PMID: 22829957
ANXIETY-Neurodevelopment Deviation and Maintenance Failure	Pleiotrophin	PTN	P21246	-1	PMID: 29391390
ANXIETY-Neurodevelopment Deviation and Maintenance Failure	Midkine	MK	P21741	-1	[1]PMID: 11817214 [2]PMID: 29391390 [3]PMID: 24975970
ANXIETY-Neurodevelopment Deviation and Maintenance Failure	cAMP-dependent protein kinase catalytic subunit gamma	PRKACG	P22612	-1	[1] PMID: 22024111; [2] PMID: 27445986
ANXIETY-Neurodevelopment Deviation and Maintenance Failure	cAMP-dependent protein kinase catalytic subunit beta	PRKACB	P22694	-1	[1] PMID: 22024111; [2] PMID: 27445986
ANXIETY-Neurodevelopment Deviation and Maintenance Failure	Brain-derived neurotrophic factor	BDNF	P23560	-1	PMID: 15154976
ANXIETY-Neurodevelopment Deviation and Maintenance Failure	Adenylyl cyclase type 8	ADCY8	P40145	1	[1]PMID: 18386176 [2]PMID: 27234425 [3]PMID: 22832970
ANXIETY-Neurodevelopment Deviation and Maintenance Failure	Regulator of G-protein signaling 2	RGS2	P41220	-1	[1]PMID: 18663369 [2]PMID: 11027316 [3]PMID: 24154666
ANXIETY-Neurodevelopment Deviation and Maintenance Failure	Glycogen synthase kinase-3 alpha	GSK3B	P49840	1	PMID: 30781836
ANXIETY-Neurodevelopment Deviation and Maintenance Failure	Glycogen synthase kinase-3 beta	GSK3A	P49841	1	PMID: 30781836
ANXIETY-Neurodevelopment Deviation and Maintenance Failure	Guanine nucleotide-binding protein G(I)/G(S)/G(O) subunit gamma-4	GNG4	P50150	-1	[1]PMID: 29391390 [2]doi: 10.15761/IMM.1000376
ANXIETY-Neurodevelopment Deviation and Maintenance Failure	Ribosomal protein S6 kinase alpha-3	RPS6KA3	P51812	-1	PMID: 25157566
ANXIETY-Neurodevelopment Deviation and Maintenance Failure	Allograft inflammatory factor 1	AIF1	P55008	-1	PMID: 28061969
ANXIETY-Neurodevelopment Deviation and Maintenance Failure	Oxidized low-density lipoprotein receptor 1	ORL1	P78380	-1	[1]PMID: 17167337 [2]PMID: 16860781
ANXIETY-Neurodevelopment Deviation and Maintenance Failure	Neutrophil gelatinase-associated lipocalin	LCN2	P80188	-1	[1]PMID: 25576802 [2]PMID: 30733506
ANXIETY-Neurodevelopment Deviation and Maintenance Failure	Cyclic AMP-responsive element-binding protein 5	CREB5	Q02930	-1	[1]PMID: 18386176 [2]PMID: 18053176 [3]PMID: 30822517
ANXIETY-Neurodevelopment Deviation and Maintenance Failure	cAMP-responsive element modulator	CREM	Q03060	-1	PMID: 18386176
ANXIETY-Neurodevelopment Deviation and Maintenance Failure	Glutamate receptor ionotropic, NMDA 1	GRIN1	Q05586	-1	PMID: 19460458
ANXIETY-Neurodevelopment Deviation and Maintenance Failure	Glutamate receptor ionotropic, NMDA 2A	GRIN2A	Q12879	-1	PMID: 19460458
ANXIETY-Neurodevelopment Deviation and Maintenance Failure	Glutamate receptor ionotropic, NMDA 2B	GRIN2B	Q13224	-1	PMID: 19460458
ANXIETY-Neurodevelopment Deviation and Maintenance Failure	Calcium/calmodulin-dependent protein kinase type II subunit beta	CAMK2B	Q13554	1	[1]PMID: 15154976; [2]PMID: 19257910
ANXIETY-Neurodevelopment Deviation and Maintenance Failure	Calcium/calmodulin-dependent protein kinase type II subunit gamma	CAMK2G	Q13555	1	[1]PMID: 15154976; [2]PMID: 19257910
ANXIETY-Neurodevelopment Deviation and Maintenance Failure	Calcium/calmodulin-dependent protein kinase type II subunit delta	CAMK2D	Q13557	1	[1]PMID: 15154976; [2]PMID: 19257910
ANXIETY-Neurodevelopment Deviation and Maintenance Failure	Glutamate receptor ionotropic, NMDA 2C	GRIN2C	Q14957	-1	PMID: 19460458
ANXIETY-Neurodevelopment Deviation and Maintenance Failure	Roquin-1	RC3H1	Q5TC82	1	PMID: 25547065
ANXIETY-Neurodevelopment Deviation and Maintenance Failure	Neuronal growth regulator 1	NEGR1	Q7Z3B1	-1	PMID: 30651602
ANXIETY-Neurodevelopment Deviation and Maintenance Failure	Neuronal PAS domain-containing protein 4	NPAS4	Q8IUM7	-1	PMID: 27574128
ANXIETY-Neurodevelopment Deviation and Maintenance Failure	Glutamate receptor ionotropic, NMDA 3A	GRIN3A	Q8TCU5	-1	PMID: 19460458
ANXIETY-Neurodevelopment Deviation and Maintenance Failure	CDK5 regulatory subunit-associated protein 2	CDK5RAP2	Q96SN8	1	[1]PMID: 15154976; [2] PMID: 31060804
ANXIETY-Neurodevelopment Deviation and Maintenance Failure	G-protein coupled estrogen receptor 1	GPER1	Q99527	-1	[1]PMID: 24653954 [2]PMID: 23970785
ANXIETY-Neurodevelopment Deviation and Maintenance Failure	Calcium/calmodulin-dependent protein kinase type II subunit alpha	CAMK2A	Q9UQM7	1	[1]PMID: 15154976; [2]PMID: 19257910
ANXIETY-Neurodevelopment Deviation and Maintenance Failure	RAC-gamma serine/threonine-protein kinase	AKT3	Q9Y243	-1	PMID: 28442992
ANXIETY-Neurodevelopment Deviation and Maintenance Failure	Insulin receptor substrate 2	IRS2	Q9Y4H2	-1	PMID: 25157566
ANXIETY-Neurotransmission Alteration	Orexin	HCRT	O43612	1	PMID: 22813973
ANXIETY-Neurotransmission Alteration	Tumor necrosis factor	TNF	P01375	1	PMID: 23415758
ANXIETY-Neurotransmission Alteration	Interferon gamma	IFNG	P01579	1	PMID: 24993299
ANXIETY-Neurotransmission Alteration	Cholecystokinin	CCK	P06307	1	[1]PMID: 15885255 ; [2] PMID: 22553078
ANXIETY-Neurotransmission Alteration	5-hydroxytryptamine receptor 1A	HTR1A	P08908	-1	[1]PMID: 12437941 ; [2] PMID: 18386176
ANXIETY-Neurotransmission Alteration	Corticotropin-releasing factor receptor 1	CRHR1	P34998	1/-1	PMID: 23164543
ANXIETY-Neurotransmission Alteration	Nestafin-1	NUCB2	P80303	1	PMID: 29253527
ANXIETY-Neurotransmission Alteration	Receptor tyrosine-protein kinase erbB-4	ERBB4	Q15303	-1	[1]PMID: 25308353 [2]PMID: 30083275
ANXIETY-Neurotransmission Alteration	5-hydroxytryptamine receptor 3B	HTR3B	O95264	1	PMID: 30144453
ANXIETY-Neurotransmission Alteration	Phenylalanine-4-hydroxylase	PAH	P00439	-1	PMID: 24669207
ANXIETY-Neurotransmission Alteration	Apolipoprotein E	APOE	P02649	1	PMID: 31186040
ANXIETY-Neurotransmission Alteration	Tyrosine 3-monooxygenase	TH	P07101	-1	PMID: 24669207
ANXIETY-Neurotransmission Alteration	Acyl-CoA-binding protein	DBI	P07108	-1	PMID: 16904689
ANXIETY-Neurotransmission Alteration	Beta-2 adrenergic receptor	ADRB2	P07550	1	PMID: 27042068
ANXIETY-Neurotransmission Alteration	Beta-1 adrenergic receptor	ADRB1	P08588	1	PMID: 27042068
ANXIETY-Neurotransmission Alteration	Alpha-2A adrenergic receptor	ADRA2A	P08913	-1	PMID: 27042068
ANXIETY-Neurotransmission Alteration	Dystrophin	DMD	P11532	-1	PMID: 26130916
ANXIETY-Neurotransmission Alteration	Neural cell adhesion molecule 1	NCAM1	P13591	1	[1]PMID: 29391390 [2]PMID: 23412349
ANXIETY-Neurotransmission Alteration	Beta-3 adrenergic receptor	ADRB3	P13945	1	PMID: 27042068
ANXIETY-Neurotransmission Alteration	D(2) dopamine receptor	DRD2	P14416	1	[1]PMID: 26317601 [2]PMID: 28408289
ANXIETY-Neurotransmission Alteration	Gamma-aminobutyric acid receptor subunit alpha-1	GABRA1	P14867	-1	[1]PMID: 18386176 ; [2] PMID: 25653526; [3] PMID: 17117412
ANXIETY-Neurotransmission Alteration	Protein kinase C alpha type	PRKCA	P17252	-1	PMID: 15291238
ANXIETY-Neurotransmission Alteration	Tryptophan 5-hydroxylase 1	TPH1	P17752	-1	PMID: 24669207
ANXIETY-Neurotransmission Alteration	Alpha-2B adrenergic receptor	ADRA2B	P18089	-1	PMID: 27042068
ANXIETY-Neurotransmission Alteration	Alpha-2C adrenergic receptor	ADRA2C	P18825	-1	PMID: 27042068
ANXIETY-Neurotransmission Alteration	Protachykinin-1	TAC1	P20366	1	PMID: 19442179
ANXIETY-Neurotransmission Alteration	Amine oxidase [flavin-containing] A	MAOA	P21397	1	[1]PMID: 18386176 [2]PMID: 18386176
ANXIETY-Neurotransmission Alteration	Substance-K receptor	TACR2	P21452	1	PMID: 19442179
ANXIETY-Neurotransmission Alteration	D(1A) dopamine receptor	DRD1	P21728	1	PMID: 26317601
ANXIETY-Neurotransmission Alteration	Galanin peptides	GAL	P22466	1	PMID: 12437941
ANXIETY-Neurotransmission Alteration	Sodium-dependent noradrenaline transporter	SLC6A2	P23975	1	[1]PMID: 12437941; [2] PMID: 16871320
ANXIETY-Neurotransmission Alteration	Alpha-1D adrenergic receptor	ADRA1D	P25100	1	PMID: 27042068
ANXIETY-Neurotransmission Alteration	Substance-P receptor	TACR1	P25103	1	PMID: 19442179
ANXIETY-Neurotransmission Alteration	Amine oxidase [flavin-containing] B	MAOB	P27338	-1	PMID: 19710633
ANXIETY-Neurotransmission Alteration	5-hydroxytryptamine receptor 1B	HTR1B	P28222	-1	PMID: 30144453
ANXIETY-Neurotransmission Alteration	5-hydroxytryptamine receptor 2A	HTR2A	P28223	1	PMID: 30144453
ANXIETY-Neurotransmission Alteration	5-hydroxytryptamine receptor 2C	HTR2C	P28335	1/-1	PMID: 30144453
ANXIETY-Neurotransmission Alteration	Neuromedin-K receptor	TACR3	P29371	1	PMID: 19442179
ANXIETY-Neurotransmission Alteration	Sodium- and chloride-dependent GABA transporter 1	SLC6A1	P30531	1	[1]PMID: 18607529 [2]PMID: 19077666
ANXIETY-Neurotransmission Alteration	Sodium-dependent serotonin transporter	SLC6A4	P31645	1	[1]PMID: 15291238 ;[2]PMID: 12437941
ANXIETY-Neurotransmission Alteration	Gamma-aminobutyric acid receptor subunit alpha-3	GABRA3	P34903	-1	[1]PMID: 18386176 ; [2] PMID: 25653526; [3] PMID: 17117412
ANXIETY-Neurotransmission Alteration	5-hydroxytryptamine receptor 7	HTR7	P34969	1	PMID: 30144453
ANXIETY-Neurotransmission Alteration	Nitric oxide synthase, inducible	NOS2	P35228	1	PMID: 24993299
ANXIETY-Neurotransmission Alteration	Alpha-1A adrenergic receptor	ADRA1A	P35348	1	PMID: 27042068
ANXIETY-Neurotransmission Alteration	Alpha-1B adrenergic receptor	ADRA1B	P35368	1	PMID: 27042068
ANXIETY-Neurotransmission Alteration	D(3) dopamine receptor	DRD3	P35462	1	PMID: 26619275
ANXIETY-Neurotransmission Alteration	Glutamate receptor ionotropic, kainate 1	GRIK1	P39086	-1	PMID: 17245443
ANXIETY-Neurotransmission Alteration	5-hydroxytryptamine receptor 2B	HTR2B	P41595	-1	PMID: 30144453
ANXIETY-Neurotransmission Alteration	Glutamate receptor 1	GRIA1	P42261	1	PMID: 29391390
ANXIETY-Neurotransmission Alteration	Gamma-aminobutyric acid receptor subunit alpha-2	GABRA2	P47869	-1	[1]PMID: 18386176 ; [2] PMID: 25653526; [3] PMID: 17117412
ANXIETY-Neurotransmission Alteration	5-hydroxytryptamine receptor 5A	HTR5A	P47898	1	PMID: 30144453
ANXIETY-Neurotransmission Alteration	Sodium/potassium-transporting ATPase subunit alpha-2	ATP1A2	P50993	-1	PMID: 29391390
ANXIETY-Neurotransmission Alteration	Protein delta homolog 1	DLK1	P80370	-1	PMID: 30268817
ANXIETY-Neurotransmission Alteration	Sodium-dependent dopamine transporter	SLC6A3	Q01959	-1	PMID: 28408289
ANXIETY-Neurotransmission Alteration	Pro-neuregulin-1, membrane-bound isoform	NGR1	Q02297	-1	[1]PMID: 25308353 [2]PMID: 30186060
ANXIETY-Neurotransmission Alteration	Glutamate decarboxylase 2	GAD2	Q05329	-1	[1]PMID: 18386176 [2]PMID: 31078031
ANXIETY-Neurotransmission Alteration	Glutamate receptor ionotropic, kainate 2	GRIK2	Q13002	-1	PMID: 30770891
ANXIETY-Neurotransmission Alteration	Metabotropic glutamate receptor 2	GRM2	Q14416	-1	PMID: 17948876
ANXIETY-Neurotransmission Alteration	Metabotropic glutamate receptor 3	GRM3	Q14832	-1	PMID: 17948876
ANXIETY-Neurotransmission Alteration	1-phosphatidylinositol 4,5-bisphosphate phosphodiesterase beta-4	PLCB4	Q15147	-1	PMID: 29391390
ANXIETY-Neurotransmission Alteration	Glutamate receptor ionotropic, kainate 4	GRIK4	Q16099	-1	[1]PMID: 30770891 [2]PMID: 29688548
ANXIETY-Neurotransmission Alteration	BDNF/NT-3 growth factors receptor	NTRK2	Q16620	-1	PMID: 29315742
ANXIETY-Neurotransmission Alteration	Indoleamine 2,3-dioxygenase 2	IDO2	Q6ZQW0	1	PMID: 24993299
ANXIETY-Neurotransmission Alteration	Tryptophan 5-hydroxylase 2	TPH2	Q8IWU9	-1	PMID: 24669207
ANXIETY-Neurotransmission Alteration	Serine/threonine-protein kinase ULK4	ULK4	Q96C45	-1	PMID: 29391390
ANXIETY-Neurotransmission Alteration	Ras/Rap GTPase-activating protein SynGAP	SYNGAP1	Q96PV0	1	[1]PMID: 29391390 [2]PMID: 27086544
ANXIETY-Neurotransmission Alteration	Glutamate decarboxylase 1	GAD1	Q99259	-1	PMID: 23906988
ANXIETY-Neurotransmission Alteration	Neuronal PAS domain-containing protein 2	NPAS2	Q99743	1	PMID: 29163035
ANXIETY-Neurotransmission Alteration	Tachykinin-3	TAC3	Q9UHF0	1	PMID: 19442179
BIPOLAR DISORDER-Membrane ion channels dysregulation	Protein kinase C gamma type	PRKCG	P05129	1	[1] PMID: 11252663
BIPOLAR DISORDER-Membrane ion channels dysregulation	Apoptosis regulator Bcl-2	BCL2	P10415	-1	[1] PMID: 29310970 [2] PMID: 26531027 [3] PMID: 25563670
BIPOLAR DISORDER-Membrane ion channels dysregulation	Potassium channel subfamily K member 1	KCNK1	O00180	-1	[1] PMID: 27602355 [2]PMID: 23554570
BIPOLAR DISORDER-Membrane ion channels dysregulation	Protein S100-B	S100B	P04271	1	[1] PMID: 16956621
BIPOLAR DISORDER-Membrane ion channels dysregulation	Sodium/potassium-transporting ATPase subunit alpha-3	ATP1A3	P13637	-1	[1] PMID: 30087257 [2] PMID: 25753128
BIPOLAR DISORDER-Membrane ion channels dysregulation	Neuronal calcium sensor 1	NCS-1	P62166	1	PMID: 29354402
BIPOLAR DISORDER-Membrane ion channels dysregulation	Ankyirin-3	ANK3	Q12955	-1	[1] PMID: 26210959 [2] PMID: 27602355 [3] PMID: 28476640
BIPOLAR DISORDER-Membrane ion channels dysregulation	Voltage-dependent L-type calcium channel subunit alpha-1C	CACNA1C	Q13936	-1	[1] PMID: 26210959 [2] PMID: 28476640
BIPOLAR DISORDER-Membrane ion channels dysregulation	Voltage-gated potassium channel subunit beta-1	KCNAB1	Q14722	-1	[1] PMID: 27602355 [2] PMID: 23781230
BIPOLAR DISORDER-Neurodevelopment deviation and maintenance failure	Glycogen synthase kinase-3 alpha	GSK3A	P49840	1	[1] PMID: 31625128 [2] PMID: 27630757
BIPOLAR DISORDER-Neurodevelopment deviation and maintenance failure	Glycogen synthase kinase-3 beta	GSK3B	P49841	1	[1] PMID: 31625128 [2] PMID: 27630757
BIPOLAR DISORDER-Neurodevelopment deviation and maintenance failure	Circadian locomoter output cycles protein kaput	CLOCK	O15516	-1	[1] PMID: 25726988 [2] PMID: 26531028
BIPOLAR DISORDER-Neurodevelopment deviation and maintenance failure	Acetylserotonin O-methyltransferase	ASMT	P46597	-1	PMID: 27091850
BIPOLAR DISORDER-Neurodevelopment deviation and maintenance failure	Casein kinase I isoform delta, CKI-delta	CSNK1D	P48730	1	PMID: 31625128
BIPOLAR DISORDER-Neurotransmission dysregulation	Indoleamine 2,3-dioxygenase 1	IDO1	P14902	1	[1] PMID: 26859499 [2] PMID: 27889479 [3]PMID: 25620790
BIPOLAR DISORDER-Neurotransmission dysregulation	Glial cell line-derived neurotrophic factor, hGDNF	GDNF	P39905	1	[1] PMID: 16959421 [2]DOI: 10.13140/RG.2.2.16852.81285
BIPOLAR DISORDER-Neurotransmission dysregulation	Glycogen synthase kinase-3 alpha	GSK3A	P49840	1	[1]PMID: 16944320 [2]PMID: 27630757
BIPOLAR DISORDER-Neurotransmission dysregulation	Glycogen synthase kinase-3 beta	GSK3B	P49841	1	[1]PMID: 16944320 [2]PMID: 27630757
BIPOLAR DISORDER-Neurotransmission dysregulation	Nuclear factor NF-kappa-B p100 subunit	NFKB2	Q00653	1	PMID: 26859499
BIPOLAR DISORDER-Neurotransmission dysregulation	Protein kinase C epsilon type	PRKCE	Q02156	-1	[1] PMID: 11252663 [2] PMID: 29230399 [3] PMID: 29230399 [4] PMID 12473185
BIPOLAR DISORDER-Neurotransmission dysregulation	C-C motif chemokine 24	CCL24	O00175	1	PMID: 32174850
BIPOLAR DISORDER-Neurotransmission dysregulation	Tumor necrosis factor	TNF	P01375	1	PMID: 30586559
BIPOLAR DISORDER-Neurotransmission dysregulation	Interferon Gamma	IFNG	P01579	1	PMID: 26766943
BIPOLAR DISORDER-Neurotransmission dysregulation	Interleukin-1 beta (IL-1β)	IL1B	P01584	1	PMID: 29084144
BIPOLAR DISORDER-Neurotransmission dysregulation	Soluble interleukin-2 receptor (sIL-2R) subunit alpha	IL2RA	P01589	1	PMID: 29084144
BIPOLAR DISORDER-Neurotransmission dysregulation	C-Reactive Protein	CRP	P02741	1	[1] PMID: 27800654 [2] PMID: 10852144
BIPOLAR DISORDER-Neurotransmission dysregulation	C-X-C motif chemokine 10	CXCL10	P02778	1	PMID: 32174850
BIPOLAR DISORDER-Neurotransmission dysregulation	Interleukin-4	IL4	P05112	1	PMID: 29084144
BIPOLAR DISORDER-Neurotransmission dysregulation	Interleukin-6	IL6	P05231	1	[1] PMID: 29084144 [2] PMID: 26859499
BIPOLAR DISORDER-Neurotransmission dysregulation	Matrilysin	MMP7	P09237	1	[1] PMID: 27800654 [2] PMID: 28886448
BIPOLAR DISORDER-Neurotransmission dysregulation	C-C motif chemokine 2	CCL2	P13500	1	PMID: 26859499
BIPOLAR DISORDER-Neurotransmission dysregulation	Glial fibrillary acidic protein	GFAP	P14136	1	PMID: 28847296
BIPOLAR DISORDER-Neurotransmission dysregulation	Matrix metalloproteinase-9	MMP9	P14780	1	[1] PMID: 27800654 [2] PMID: 22858217
BIPOLAR DISORDER-Neurotransmission dysregulation	Soluble interleukin-2 receptor (sIL-2R) subunit beta	IL2RB	P14784	1	PMID: 29084144
BIPOLAR DISORDER-Neurotransmission dysregulation	Tumor necrosis factor receptor superfamily member 1A	TNFRSF1A	P19438	1	PMID: 30586559
BIPOLAR DISORDER-Neurotransmission dysregulation	Tumor necrosis factor receptor superfamily member 1B	TNFRSF1B	P20333	1	PMID: 30586559
BIPOLAR DISORDER-Neurotransmission dysregulation	Protein kinase C eta type	PRKCH	P24723	1	[1] PMID: 11252663 [2] PMID: 29230399 [3] PMID: 29230399 [4] UNIPROT
BIPOLAR DISORDER-Neurotransmission dysregulation	Tryptophan 2,3-dioxygenase	TDO2	P48775	1	PMID: 27800654
BIPOLAR DISORDER-Neurotransmission dysregulation	Eotaxin	CCL11	P51671	1	PMID: 32174850
BIPOLAR DISORDER-Neurotransmission dysregulation	Interleukin-10	IL10	Q13651	-1	PMID: 27630757
BIPOLAR DISORDER-Chronic inflammatory state	Protein kinase C gamma type	PRKCG	P05129	1	[1] PMID: 11252663 [2] PMID: 29230399 [3] PMID: 29230399 [4] UNIPROT
BIPOLAR DISORDER-Chronic inflammatory state	Glycogen synthase kinase-3 alpha	GSK3A	P49840	1	[1] PMID: 31625128 [2] PMID: 27630757
BIPOLAR DISORDER-Chronic inflammatory state	Glycogen synthase kinase-3 beta	GSK3B	P49841	1	[1] PMID: 31625128 [2] PMID: 27630757
BIPOLAR DISORDER-Chronic inflammatory state	NADH dehydrogenase [ubiquinone] iron-sulfur protein 7	NDUFS7	O75251	-1	PMID: 26723136
BIPOLAR DISORDER-Chronic inflammatory state	Superoxide dismutase	SOD1	P00441	-1	PMID: 30087257
BIPOLAR DISORDER-Chronic inflammatory state	5-hydroxytryptamine receptor 7	HTR7	P34969	1	PMID: 31625128
BIPOLAR DISORDER-Chronic inflammatory state	Caspase-3	CASP3	P42574	1	PMID: 27389787
BIPOLAR DISORDER-Circadian system dysregulation	DNA (cytosine-5)-methyltransferase	DNMT1	P26358	1	PMID: 27328785
BIPOLAR DISORDER-Circadian system dysregulation	Methyl-CpG-binding protein 2	MECP2	P51608	-1	[1] PMID: 28476640 [2] PMID: 26237041
BIPOLAR DISORDER-Circadian system dysregulation	Histone deacetylase-4	HDAC4	P56524	1	PMID: 27480490
BIPOLAR DISORDER-Circadian system dysregulation	Zinc finger protein 804A	ZNF804A	Q7Z570	1	[1] PMID: 28476640 [2] https://doi.org/10.1016/B0-12-443710-9/00713-4
BIPOLAR DISORDER-Circadian system dysregulation	Histone deacetylase-8	HDAC8	Q9BY41	-1	PMID: 27480490
BIPOLAR DISORDER-Circadian system dysregulation	Histone deacetylase-6	HDAC6	Q9UBN7	-1	PMID: 27480490
BIPOLAR DISORDER-Circadian system dysregulation	DNA (cytosine-5)-methyltransferase 3A	DNMT3A	Q9Y6K1	1	PMID: 27328785
BIPOLAR DISORDER-Oxidative stress	Beta-nerve growth factor	NGF	P01138	-1	[1] PMID: 31014945 [2] PMID: 23785335
BIPOLAR DISORDER-Oxidative stress	Beta-nerve growth factor	NGF	P01138	1	PMID: 28135645
BIPOLAR DISORDER-Oxidative stress	Apoptosis regulator Bcl-2	BCL2	P10415	-1	[1] PMID: 25563670
BIPOLAR DISORDER-Oxidative stress	Mitogen-activated protein kinase 3	MAPK3	P27361	-1	[1] PMID: 26531027 [2] UNIPROT
BIPOLAR DISORDER-Oxidative stress	Protein kinase C epsilon type	PRKCE	Q02156	-1	[1] PMID: 11252663 [2] PMID: 29230399 [3] PMID: 29230399 [4] PMID 12473185
BIPOLAR DISORDER-Oxidative stress	Neurocan core protein	NCAN	O14594	-1	[1] PMID: 27800654 [2] PMID: 23795679 [3] PMID: 22952076
BIPOLAR DISORDER-Oxidative stress	Insulin-like growth factor I, IGF-I	IGF1	P05019	1	PMID: 28135645
BIPOLAR DISORDER-Oxidative stress	Fibroblast growth factor 2	FGF2	P09038	1	PMID: 28135645
BIPOLAR DISORDER-Oxidative stress	Insulin-like growth factor-binding protein 2	IGFBP2	P18065	-1	PMID: 28135645
BIPOLAR DISORDER-Oxidative stress	Brain-derived neurotrophic factor, BDNF	BDNF	P23560	-1	[1] PMID: 30078664 [2] PMID: 26531027 [3] PMID: 31014945
BIPOLAR DISORDER-Oxidative stress	Teneurin-4	TENM4	Q6N022	-1	[1] PMID: 27800654 [2] UNIPROT: Q6N022
BIPOLAR DISORDER-DNA damage	Protein kinase C gamma type	PRKCG	P05129	1	[1] PMID: 11252663 [2] PMID: 29230399 [3] PMID: 29230399 [4] UNIPROT
BIPOLAR DISORDER-DNA damage	Indoleamine 2,3-dioxygenase 1	IDO1	P14902	1	[1]PMID: 26654772 [2]PMID: 26654772
BIPOLAR DISORDER-DNA damage	Mitogen-activated protein kinase 3	MAPK3	P27361	1	PMID: 30087257
BIPOLAR DISORDER-DNA damage	Glial cell line-derived neurotrophic factor, hGDNF	GDNF	P39905	1	[1] PMID: 16959421 [2]DOI: 10.13140/RG.2.2.16852.81285
BIPOLAR DISORDER-DNA damage	Nuclear factor NF-kappa-B p100 subunit	NFKB2	Q00653	1	PMID: 30087257
BIPOLAR DISORDER-DNA damage	Muscarinic acetylcholine receptor M2	CHRM2	P08172	-1	PMID: 27772534
BIPOLAR DISORDER-DNA damage	D(2) dopamine receptor	DRD2	P14416	1	PMID: 28289283
BIPOLAR DISORDER-DNA damage	Nuclear factor NF-kappa-B p105 subunit	NFKB1	P19838	1	PMID: 30087257
BIPOLAR DISORDER-DNA damage	Catechol O-methyltransferase	COMT	P21964	-1	PMID: 27458023
BIPOLAR DISORDER-DNA damage	Mitogen-activated protein kinase 1	MAPK1	P28482	1	PMID: 30087257
BIPOLAR DISORDER-DNA damage	RAC-alpha serine/threonine-protein kinase	AKT1	P31749	1	PMID: 30087257
BIPOLAR DISORDER-DNA damage	RAC-beta serine/threonine-protein kinase	AKT2	P31751	1	PMID: 30087257
BIPOLAR DISORDER-DNA damage	D(3) dopamine receptor	DRD3	P35462	1	PMID: 28289283
BIPOLAR DISORDER-DNA damage	Glutamate receptor ionotropic, kainate 2	GRIK2	Q13002	-1	PMID: 26531027
BIPOLAR DISORDER-DNA damage	Nesprin-1	SYNE1	Q8NF91	-1	[1] PMID: 28476640 [2] PMID: 30610203
BIPOLAR DISORDER-DNA damage	Glutamate decarboxylase 1	GAD1	Q99259	-1	[1] PMID: 27328785 [2] 30625343
BIPOLAR DISORDER-DNA damage	RAC-gamma serine/threonine-protein kinase	AKT3	Q9Y243	1	PMID: 30087257
TICS-Neuroinflammation	Tumor necrosis factor	TNF	P01375	1	[1] PMID: 25658821
TICS-Neuroinflammation	Interleukin-4	IL4	P05112	-1	[1] PMID: 25658821
TICS-Neuroinflammation	Interleukin-5	IL5	P05113	-1	[1] PMID: 25658821
TICS-Neuroinflammation	Interleukin-13	IL13	P35225	-1	[1] PMID: 25658821
TICS-Neuroinflammation	Interleukin-2	IL2	P60568	1	PMID: 20599460
TICS-Neuroinflammation	Interleukin-17A	IL17A	Q16552	1	PMCID: PMC5616288
TICS-Neuroinflammation	Interleukin-12 subunit alpha	IL12A	P29459	1	PMCID: PMC5616288
TICS-Neuroinflammation	Interleukin-12 subunit beta	IL12B	P29460	1	PMCID: PMC5616288
TICS-Neuroinflammation	Interleukin-6	IL6	P05231	1	PMCID: PMC5616288
TICS-Neuroinflammation	60 kDa heat shock protein	HSPD1	P10809	-1	[1] PMID: 12965262
TICS-Neurodevelopment and Neuron Maintenance Failure	Laminin subunit alpha-1	LAMA1	P25391	-1	[1] PMID: 27095636
TICS-Neurodevelopment and Neuron Maintenance Failure	Forkhead box protein P2	FOXP2	O15409	-1	[1] PMID: 21386874
TICS-Neurodevelopment and Neuron Maintenance Failure	Mitochondrial inner membrane protease subunit 2	IMMP2	Q96T52	-1	[1] PMID: 21386874
TICS-Neurodevelopment and Neuron Maintenance Failure	Neuroligin-4, X-linked	NLGN4	Q8N0W4	-1	[1] PMID: 31273721 [2] PMID: 29325623
TICS-Neurodevelopment and Neuron Maintenance Failure	Contactin-associated protein-like 2	CNTNAP2	Q9UHC6	-1	[1] PMID: 17667475 [2] PMID: 16331353
TICS-Neurodevelopment and Neuron Maintenance Failure	Dipeptidyl aminopeptidase-like protein 6	DPP6	P42658	-1	PMID: 29325623
TICS-Neurotransmission Alteration	Synaptic vesicular amine transporter	SLC18A2	Q05940	1	[1] PMID: 30643668
TICS-Neurotransmission Alteration	Histidine decarboxylase	HDC	P19113	-1	[1] PMID: 30643668
TICS-Neurotransmission Alteration	Choline O-acetyltransferase	CHAT	P28329	-1	[1] PMID: 30643668
TICS-Neurotransmission Alteration	Proenkephalin-A	PENK	P01210	1	[1] PMID: 30643668
TICS-Neurotransmission Alteration	Probable hydrolase PNKD	PNKD	Q8N490	-1	[1] PMID: 28894297 [2] PMID: 21487022
TICS-Neurotransmission Alteration	Synaptic vesicular amine transporter	SLC18A2	Q05940	1	PMID: 32286097
TICS-Neurotransmission Alteration	D(1A) dopamine receptor	DRD1	P21728	1	PMID: 24295621
TICS-Neurotransmission Alteration	5-hydroxytryptamine receptor 2A	HTR2A	P28223	1	PMID: 32286097
TICS-Neurotransmission Alteration	5-hydroxytryptamine receptor 2B	HTR2B	P41595	1	PMID: 32286097
TICS-Neurotransmission Alteration	5-hydroxytryptamine receptor 2C	HTR2C	P28335	1	PMID: 32286097
TICS-Neurotransmission Alteration	D(3) dopamine receptor	DRD3	P35462	1	PMID: 32286097
TICS-Neurotransmission Alteration	D(4) dopamine receptor	DRD4	P21917	1	PMID: 32286097
TICS-Neurotransmission Alteration	Histamine H1 receptor	HRH1	P35367	1	PMID: 32286097
TICS-Neurotransmission Alteration	D(2) dopamine receptor	DRD2	P14416	1	PMID: 24295621
TICS-Neurotransmission Alteration	Amine oxidase [flavin-containing] A	MAOA	P21397	1	PMID: 24295621
TICS-Neurotransmission Alteration	5-hydroxytryptamine receptor 3A	HTR3A	P46098	1	PMID: 32286097
TICS-Neurotransmission Alteration	5-hydroxytryptamine receptor 4	HTR4	Q13639	1	PMID: 32286097
TICS-Neurotransmission Alteration	Regulating synaptic membrane exocytosis protein 1	RIMS1	Q86UR5	1	[1] PMID: 28894297
TICS-Neurotransmission Alteration	Parvalbumin alpha	PVALB	P20472	1	[1] PMID: 28237575
TICS-Neurotransmission Alteration	Nitric oxide synthase, brain	NOS1	P29475	1	[1] PMID: 28237575
TICS-Neurotransmission Alteration	SLIT and NTRK-like protein 1	SLITRK1	Q96PX8	-1	[1] PMID: 17667475
TICS-Neurotransmission Alteration	Histidine decarboxylase	HDC	P19113	-1	PMID: 29325623
BINGE EATING-Neurotransmission Alteration in Impulse Control Circuitry	Dopamine beta-hydroxylase (EC 1.14.17.1) (Dopamine beta-monooxygenase) [Cleaved into: Soluble dopamine beta-hydroxylase]	DBH	P09172	1	PMID: 31714807
BINGE EATING-Neurotransmission Alteration in Impulse Control Circuitry	Sodium-dependent noradrenaline transporter, NET	SLC6A2	P23975	1	PMID: 31714807
BINGE EATING-Neurotransmission Alteration in Impulse Control Circuitry	Brain-derived neurotrophic factor, BDNF	BDNF	P23560	-1	[1] PMID: 31746551 [2] PMID: 20537407
BINGE EATING-Neurotransmission Alteration in Impulse Control Circuitry	5-hydroxytryptamine receptor 2C	HTR2C	P28335	-1	PMID: 29324652
BINGE EATING-Neurotransmission Alteration in Impulse Control Circuitry	Sodium-dependent serotonin transporter, SERT	SLC6A4	P31645	1	PMID: 31714807
BINGE EATING-Neurotransmission Alteration in Impulse Control Circuitry	BDNF/NT-3 growth factors receptor	TRKB	Q16620	-1	PMID: 31746551
BINGE EATING-Neurotransmission Alteration in Impulse Control Circuitry	D(1A) dopamine receptor	DRD1	P21728	1	PMID: 17924782
BINGE EATING-Neurotransmission Alteration in Impulse Control Circuitry	D(2) dopamine receptor	DRD2	P14416	-1	PMID: 29324652
BINGE EATING-Neurotransmission Alteration in Impulse Control Circuitry	Sodium-dependent dopamine transporter, DAT	SLC6A3	Q01959	1	[1] PMID: 31714807 [2] PMID: 20417658
BINGE EATING-Neurotransmission Alteration in Impulse Control Circuitry	Synaptic vesicular amine transporter	SLC18A2	Q05940	1	PMID: 28560316
BINGE EATING-Neurotransmission Alteration in Impulse Control Circuitry	Gamma-aminobutyric acid type B receptor subunit 1 (GABA-B receptor 1) (GABA-B-R1) (GABA-BR1) (GABABR1) (Gb1)	GABBR1	Q9UBS5	-1	[1] PMID: 31714807 [2] PMID: 28546212
BINGE EATING-Neurotransmission Alteration in Impulse Control Circuitry	Gamma-aminobutyric acid type B receptor subunit 2 (GABA-B receptor 2) (GABA-B-R2) (GABA-BR2) (GABABR2) (Gb2) (G-protein coupled receptor 51) (HG20)	GABBR2	O75899	-1	PMID: 31714807
BINGE EATING-Neurotransmission Alteration in Impulse Control Circuitry	Gamma-aminobutyric acid receptor subunit alpha-1 (GABA(A) receptor subunit alpha-1)	GABRA1	P14867	-1	[1] PMID: 12562571 [2] PMID: 28546212
BINGE EATING-Neurotransmission Alteration in Impulse Control Circuitry	Gamma-aminobutyric acid receptor subunit alpha-2 (GABA(A) receptor subunit alpha-2)	GABRA2	P47869	-1	PMID: 28546212
BINGE EATING-Neurotransmission Alteration in Impulse Control Circuitry	Gamma-aminobutyric acid receptor subunit alpha-3 (GABA(A) receptor subunit alpha-3)	GABRA3	P34903	-1	PMID: 28546212
BINGE EATING-Neurotransmission Alteration in Impulse Control Circuitry	Gamma-aminobutyric acid receptor subunit alpha-4 (GABA(A) receptor subunit alpha-4)	GABRA4	P48169	-1	PMID: 28546212
BINGE EATING-Neurotransmission Alteration in Impulse Control Circuitry	Gamma-aminobutyric acid receptor subunit alpha-5 (GABA(A) receptor subunit alpha-5)	GABRA5	P31644	-1	PMID: 28546212
BINGE EATING-Neurotransmission Alteration in Impulse Control Circuitry	Gamma-aminobutyric acid receptor subunit alpha-6 (GABA(A) receptor subunit alpha-6)	GABRA6	Q16445	-1	PMID: 28546212
BINGE EATING-Neurotransmission Alteration in Impulse Control Circuitry	Glutamate receptor 1 (GluR-1) (AMPA-selective glutamate receptor 1) (GluR-A) (GluR-K1) (Glutamate receptor ionotropic, AMPA 1) (GluA1)	GRIA1	P42261	1	PMID: 12562571
BINGE EATING-Neurotransmission Alteration in Impulse Control Circuitry	Glutamate receptor 2 (GluR-2) (AMPA-selective glutamate receptor 2) (GluR-B) (GluR-K2) (Glutamate receptor ionotropic, AMPA 2) (GluA2)	GRIA2	P42262	1	PMID: 12562571
BINGE EATING-Neurotransmission Alteration in Impulse Control Circuitry	Glutamate receptor 3 (GluR-3) (AMPA-selective glutamate receptor 3) (GluR-C) (GluR-K3) (Glutamate receptor ionotropic, AMPA 3) (GluA3)	GRIA3	P42263	1	PMID: 12562571
BINGE EATING-Neurotransmission Alteration in Impulse Control Circuitry	Glutamate receptor 4 (GluR-4) (GluR4) (AMPA-selective glutamate receptor 4) (GluR-D) (Glutamate receptor ionotropic, AMPA 4) (GluA4)	GRIA4	P48058	1	PMID: 12562571
BINGE EATING-Neurotransmission Alteration in Impulse Control Circuitry	Glutamate receptor ionotropic, kainate 1 (GluK1) (Excitatory amino acid receptor 3) (EAA3) (Glutamate receptor 5) (GluR-5) (GluR5)	GRIK1	P39086	1	PMID: 12562571
BINGE EATING-Neurotransmission Alteration in Impulse Control Circuitry	Glutamate receptor ionotropic, kainate 2 (GluK2) (Excitatory amino acid receptor 4) (EAA4) (Glutamate receptor 6) (GluR-6) (GluR6)	GRIK2	Q13002	1	PMID: 12562571
BINGE EATING-Neurotransmission Alteration in Impulse Control Circuitry	Glutamate receptor ionotropic, kainate 3 (GluK3) (Excitatory amino acid receptor 5) (EAA5) (Glutamate receptor 7) (GluR-7) (GluR7)	GRIK3	Q13003	1	PMID: 12562571
BINGE EATING-Neurotransmission Alteration in Impulse Control Circuitry	Glutamate receptor ionotropic, kainate 4 (GluK4) (Excitatory amino acid receptor 1) (EAA1) (Glutamate receptor KA-1) (KA1)	GRIK4	Q16099	1	PMID: 12562571
BINGE EATING-Neurotransmission Alteration in Impulse Control Circuitry	Glutamate receptor ionotropic, kainate 5 (GluK5) (Excitatory amino acid receptor 2) (EAA2) (Glutamate receptor KA-2) (KA2)	GRIK5	Q16478	1	PMID: 12562571
BINGE EATING-Neurotransmission Alteration in Impulse Control Circuitry	Glutamate receptor ionotropic, NMDA 1 (GluN1) (Glutamate [NMDA] receptor subunit zeta-1) (N-methyl-D-aspartate receptor subunit NR1) (NMD-R1)	GRIN1	Q05586	1	PMID: 28762842
BINGE EATING-Neurotransmission Alteration in Impulse Control Circuitry	Glutamate receptor ionotropic, NMDA 2A (GluN2A) (Glutamate [NMDA] receptor subunit epsilon-1) (N-methyl D-aspartate receptor subtype 2A) (NMDAR2A) (NR2A) (hNR2A)	GRIN2A	Q12879	1	PMID: 28762842
BINGE EATING-Neurotransmission Alteration in Impulse Control Circuitry	Glutamate receptor ionotropic, NMDA 2B (GluN2B) (Glutamate [NMDA] receptor subunit epsilon-2) (N-methyl D-aspartate receptor subtype 2B) (NMDAR2B) (NR2B) (N-methyl-D-aspartate receptor subunit 3) (NR3) (hNR3)	GRIN2B	Q13224	1	PMID: 28762842
BINGE EATING-Neurotransmission Alteration in Impulse Control Circuitry	Glutamate receptor ionotropic, NMDA 2C (GluN2C) (Glutamate [NMDA] receptor subunit epsilon-3) (N-methyl D-aspartate receptor subtype 2C) (NMDAR2C) (NR2C)	GRIN2C	Q14957	1	PMID: 28762842
BINGE EATING-Neurotransmission Alteration in Impulse Control Circuitry	Glutamate receptor ionotropic, NMDA 2D (GluN2D) (EB11) (Glutamate [NMDA] receptor subunit epsilon-4) (N-methyl D-aspartate receptor subtype 2D) (NMDAR2D) (NR2D)	GRIN2D	O15399	1	PMID: 28762842
BINGE EATING-Neurotransmission Alteration in Impulse Control Circuitry	Glutamate receptor ionotropic, NMDA 3A (GluN3A) (N-methyl-D-aspartate receptor subtype 3A) (NMDAR3A) (NR3A) (NMDAR-L)	GRIN3A	Q8TCU5	1	PMID: 28762842
BINGE EATING-Neurotransmission Alteration in Impulse Control Circuitry	Glutamate receptor ionotropic, NMDA 3B (GluN3B) (N-methyl-D-aspartate receptor subtype 3B) (NMDAR3B) (NR3B)	GRIN3B	O60391	1	PMID: 28762842
BINGE EATING-Neurotransmission Alteration in Impulse Control Circuitry	Trace amine-associated receptor 1	TAAR1	Q96RJ0	-1	PMID: 29535626
BINGE EATING-Deregulation of Appetite Mechanisms	Glucago [Cleaved into: GLP-1]	GCG	P01275	-1	[1] PMID: 28846695 [2] PMID: 28762842 [3] PMID: 29324652
BINGE EATING-Deregulation of Appetite Mechanisms	Glucagon-like peptide 1 receptor (GLP-1 receptor) (GLP-1-R) (GLP-1R)	GLP1R	P43220	-1	PMID: 31714807
BINGE EATING-Deregulation of Appetite Mechanisms	Peptide YY (PYY) (PYY-I) (Peptide tyrosine tyrosine) [Cleaved into: Peptide YY(3-36) (PYY-II)]	PYY	P10082	-1	[1] PMID: 28762842 [2] PMID: 18534636
BINGE EATING-Deregulation of Appetite Mechanisms	Agouti-related protein	AGRP	O00253	1	[1] PMID: 28762842 [2] DOI: 10.1016/j.rmta.2017.04.004 [3]PMID: 28072397
BINGE EATING-Deregulation of Appetite Mechanisms	Orexin	HCRT OX	O43612	1	[1] PMID: 28762842 [2] PMID: 22569505 [3] PMID: 30125533
BINGE EATING-Deregulation of Appetite Mechanisms	Orexin receptor type 1	HCRTR1	O43613	1	PMID: 22569505
BINGE EATING-Deregulation of Appetite Mechanisms	Orexin receptor type 2	HCRTR2	O43614	1	PMID: 30125533
BINGE EATING-Deregulation of Appetite Mechanisms	Melanocortin receptor 4	MC4R	P32245	-1	PMID: 29367837
BINGE EATING-Deregulation of Appetite Mechanisms	Cannabinoid receptor 1	CNR1	P21554	1	[1] PMID: 23072421 [2] PMID: 29261146
BINGE EATING-Deregulation of Appetite Mechanisms	Casein kinase I isoform epsilon	CSNK1E	P49674	-1	PMID: 29324652
BINGE EATING-Deregulation of Appetite Mechanisms	Delta-type opioid receptor, DOR	OPRD1	P41143	1	PMID: 26499083
BINGE EATING-Deregulation of Appetite Mechanisms	Kappa-type opioid receptor, KOR	OPRK1	P41145	1	PMID: 26499083
BINGE EATING-Deregulation of Appetite Mechanisms	Mu-type opioid receptor, MOR	OPRM1	P35372	1	PMID: 31714807
BINGE EATING-Deregulation of Appetite Mechanisms	Proenkephalin-A	PENK	P01210	-1	PMID: 22138162
BINGE EATING-Deregulation of Appetite Mechanisms	Corticotropin-releasing factor receptor 1	CRHR1	P34998	1	[1] PMID: 29324652 [2] PMID: 29324652
BINGE EATING-Deregulation of Appetite Mechanisms	Corticotropin-releasing factor receptor 2	CRHR2	Q13324	1	[1] PMID: 29324652 [2] PMID: 29324652
BINGE EATING-Deregulation of Appetite Mechanisms	Nociceptin receptor	OPRL1	P41146	-1	[1] PMID: 29324652 [2] PMID: 29324652
BINGE EATING-Deregulation of Appetite Mechanisms	Prepronociceptin [Cleaved into: Nocistatin; Nociceptin (Orphanin FQ) (PPNOC) ; Orphanin FQ2]	PNOC OFQ	Q13519	-1	[1] PMID: 29324652 [2] PMID: 29324652

## Sheet: B
Supplementary Table B*. Summary of the data (number of entries in the database for each data type) used as for model construction (network and training set).*The data in this table was previously published in an article describing the methodology in detail [DOI: 10.3389/fpsyt.2021.741170]
Data type	Number of entries
In-house databases information
Considered Interactions	437071
Considered Proteins	16961
Characterized Drugs	5414
Drug Targets	2690
Characterized Clinical Conditions	253
Clinical Conditions Key Proteins Characterized	4076
Training set information
Curated drug-indications restrictions	1802640 (1731 positive)
Drug-ADRs restrictions	30096 (2640 positive)
Drug-indications/ADRs protein correlations	2175
ADR: Adverse Drug Reactions

## Sheet: C
Supplementary Table C. Summary of the sources of information found in the scientific literature supporting the predicted mechanisms for virtual lisdexamfetamine in Binge Eating Disorder. Activation induced by Node A to Node B column indicates whether the first node of the interaction (Node A) activates (1) or inhibits (-1) the activity of the second node of the interaction (Node B).
Link number	Gene name Node A	Uniprot code Node A	Gene name Node B	Uniprot code Node B	Activation induced by Node A to Node B	REFERENCES
1	LDX	-	TAAR1	Q96RJ0	1	PMID: 29535626
2	LDX	-	DAT1	Q01959	-1	PMID: 19890083
3	LDX	-	SERT	P31645	-1	PMID: 27143885
4	LDX	-	NET1	P23975	-1	PMID: 27143885
5	LDX	-	MAOA	P21397	-1	PMID: 19890083
5	LDX	-	MAOB	P27338	-1	PMID: 19890083
6	TAAR1	Q96RJ0	PKC [PRKCA; PRKCB; PRKCG; PRKCD; PRKCE; PRKCH; PRKCQ]	P17252; P05771; P05129; Q05655; Q02156; P24723; Q04759	1	[1]PMID: 23315425 [2]PMID: 27092049
7	TAAR1	Q96RJ0	PKA [PRKACA; PRKACB; PRKACG; PRKAR1A; PRKAR1B; PRKAR2A; PRKAR2B]	P17612; P22694; P22612; P10644; P31321; P13861; P31323	1	[1]PMID: 23315425 [2]PMID: 27092049
8	PKC [PRKCA; PRKCB; PRKCG; PRKCD; PRKCE; PRKCH; PRKCQ]	P17252; P05771; P05129; Q05655; Q02156; P24723; Q04759	DAT1	Q01959	-1	PMID: 25964346
9	PKC [PRKCA; PRKCB; PRKCG; PRKCD; PRKCE; PRKCH; PRKCQ]	P17252; P05771; P05129; Q05655; Q02156; P24723; Q04759	SERT	P31645	-1	PMID: 15774771
10	PKC [PRKCA; PRKCB; PRKCG; PRKCD; PRKCE; PRKCH; PRKCQ]	P17252; P05771; P05129; Q05655; Q02156; P24723; Q04759	NET1	P23975	-1	PMID: 27591044
11	PKA [PRKACA; PRKACB; PRKACG; PRKAR1A; PRKAR1B; PRKAR2A; PRKAR2B]	P17612; P22694; P22612; P10644; P31321; P13861; P31323	P38 [MAPK11; MAPK12; MAPK13;MAPK14]	Q15759; P53778; O15264; Q16539	1	[1]DOI: 10.1128/MCB.00217-10 [2]PMID: 24865460
12	PKA [PRKACA; PRKACB; PRKACG; PRKAR1A; PRKAR1B; PRKAR2A; PRKAR2B]	P17612; P22694; P22612; P10644; P31321; P13861; P31323	MAPK3	P27361	1	[1]PMID: 8798560 [2]PMID: 9808472
13	DAT1	Q01959	MAOA	P21397	1	KEGG. Homo sapiens (human): 6531. hsa04728: Dopaminergic synapse
13	DAT1	Q01959	MAOB	P27338	1	KEGG. Homo sapiens (human): 6531. hsa04728: Dopaminergic synapse
14	MAOA	P21397	MAPK3	P27361	-1	PMID: 25978500
14	MAOB	P27338	MAPK3	P27361	-1	PMID: 25978500
15	MAPK3	P27361	CREB1	P16220	1	PMID: 15371543
16	P38 [MAPK11; MAPK12; MAPK13;MAPK14]	Q15759; P53778; O15264; Q16539	CREB1	P16220	1	PMID: 19822084
17	CREB1	P16220	BDNF	P23560	1	PMID: 9390517
18	BDNF	P23560	NTRK2	Q16620	1	PMID: 23137999
19	BDNF	P23560	Binge Eating	-	-1	[1] PMID: 31746551 [2] PMID: 20537407
20	NTRK2	Q16620	Binge Eating	-	-1	PMID: 31746551
21	TAAR1	Q96RJ0	Binge Eating	-	-1	PMID: 29535626
22	DAT1	Q01959	Binge Eating	-	1	[1] PMID: 31714807 [2] PMID: 20417658
23	NET1	P23975	Binge Eating	-	1	PMID: 31714807
24	SERT	P31645	Binge Eating	-	1	PMID: 31714807

## Sheet: D
Supplementary Table D. Summary of the sources of information found in the scientific literature supporting the predicted mechanisms for virtual lisdexamfetamine in Depression. Activation induced by Node A to Node B column indicates whether the first node of the interaction (Node A) activates (1) or inhibits (-1) the activity of the second node of the interaction (Node B).
Link number	Gene name Node A	Uniprot code Node A	Gene name Node B	Uniprot code Node B	Activation induced by Node A to Node B	REFERENCES	Population
1	LDX	-	TAAR1	Q96RJ0	1	PMID: 29535626
2	LDX	-	SERT	P31645	-1	PMID: 27143885
3	LDX	-	DAT1	Q01959	-1	PMID: 19890083
4	LDX	-	MAOA	P21397	-1	PMID: 19890083
4	LDX	-	MAOB	P27338	-1	PMID: 19890083
5	LDX	-	NET1	P23975	-1	PMID: 27143885
6	TAAR1	Q96RJ0	PKC [PRKCA; PRKCB; PRKCG; PRKCD; PRKCE; PRKCH; PRKCQ]	P17252; P05771; P05129; Q05655; Q02156; P24723; Q04759	1	[1]PMID: 23315425 [2]PMID: 27092049
7	TAAR1	Q96RJ0	PKA [PRKACA; PRKACB; PRKACG; PRKAR1A; PRKAR1B; PRKAR2A; PRKAR2B]	P17612; P22694; P22612; P10644; P31321; P13861; P31323	1	[1]PMID: 23315425 [2]PMID: 27092049
8	PKC [PRKCA; PRKCB; PRKCG; PRKCD; PRKCE; PRKCH; PRKCQ]	P17252; P05771; P05129; Q05655; Q02156; P24723; Q04759	NET1	P23975	-1	PMID: 27591044
9	PKC [PRKCA; PRKCB; PRKCG; PRKCD; PRKCE; PRKCH; PRKCQ]	P17252; P05771; P05129; Q05655; Q02156; P24723; Q04759	DAT1	Q01959	-1	PMID: 25964346
10	PKC [PRKCA; PRKCB; PRKCG; PRKCD; PRKCE; PRKCH; PRKCQ]	P17252; P05771; P05129; Q05655; Q02156; P24723; Q04759	SERT	P31645	-1	PMID: 15774771
11	SERT	P31645	VAMP2	P63027	1	PMID: 24878716
12	PKC [PRKCA; PRKCB; PRKCG; PRKCD; PRKCE; PRKCH; PRKCQ]	P17252; P05771; P05129; Q05655; Q02156; P24723; Q04759	MTOR	P42345	1	[1]DOI: 10.1128/MCB.00217-10 [2]PMID: 24865460 [3]PMID: 28926616	Children
13	DAT1	Q01959	IL1B	P01584	1	[1]PMID: 12810359 [2]https://www.researchgate.net/publication/51107492_Dopamine_selectively_modulates_lipopolysaccharide-induced_TNF-alpha_IFN-qamma_and_IL-10_within_mice_tissues	Children
14	DAT1	Q01959	IFNG	P01579	1	[1]PMID: 12810359 [2]https://www.researchgate.net/publication/51107492_Dopamine_selectively_modulates_lipopolysaccharide-induced_TNF-alpha_IFN-qamma_and_IL-10_within_mice_tissues	Adults
15	DAT1	Q01959	MAOA	P21397	1	KEGG. Homo sapiens (human): 6531. hsa04728: Dopaminergic synapse+J19
15	DAT1	Q01959	MAOB	P27338	1	KEGG. Homo sapiens (human): 6531. hsa04728: Dopaminergic synapse+J19
16	VAMP2	P63027	STX1A	Q16623	1	PMID: 9169857
17	STX1A	Q16623	NET1	P23975	1	PMID: 12629174
18	IFNG	P01579	IFNGR1	P15260	1	PMID: 9208871	Adults
18	IFNG	P01579	IFNGR2	P38484	1	PMID: 9208871	Adults
19	MAOA	P21397	MAPK3	P27361	-1	PMID: 25978500	Children
19	MAOB	P27338	MAPK3	P27361	-1	PMID: 25978500	Children
20	MAOA	P21397	CREB1	P16220	-1	[1]PMID: 25978500 [2]PMID: 29107625
20	MAOB	P27338	CREB1	P16220	-1	[1]PMID: 25978500 [2]PMID: 29107625
21	IFNGR1	P15260	IRF1	P10914	1	PMID: 30306457
21	IFNGR2	P38484	IRF1	P10914	1	PMID: 30306457
22	IFNGR1	P15260	MAPK3	P27361	1	[1]PMID: 25217450 [2]PMID: 21466707 [3]PMID: 30306457
22	IFNGR2	P38484	MAPK3	P27361	1	[1]PMID: 25217450 [2]PMID: 21466707 [3]PMID: 30306457
23	IRF1	P10914	NOS2	P35228	1	PMID: 30306457
24	PKA [PRKACA; PRKACB; PRKACG; PRKAR1A; PRKAR1B; PRKAR2A; PRKAR2B]	P17612; P22694; P22612; P10644; P31321; P13861; P31323	CREB1	P16220	1	PMID: 16125054
25	CREB1	P16220	BDNF	P23560	1	PMID: 21215389
26	MAPK3	P27361	IL6	P05231	1	PMID: 10504489
27	MAPK3	P27361	JUN	P05412	1	PMID: 18435914
28	MAPK3	P27361	NFKB1	P19838	1	PMID: 32015345
29	MAPK3	P27361	TNF	P01375	1	PMID: 24647229
30	JUN	P05412	IL1B	P01584	1	PMID: 18566416
31	NFKB1	P19838	IL1B	P01584	1	PMID: 29158945
32	MAPK3	P27361	CREB1	P16220	1	DOI: 10.2147/NDT.S176399	Children
33	IL1B	P01584	NFKB1	P19838	1	[1]PMID: 15773902 [2]PMID: 17670913	Children
34	NFKB1	P19838	TNF	P01375	1	PMID: 29158945	Children
35	NFKB1	P19838	IL6	P05231	1	PMID: 29158945	Children
36	MTOR	P42345	Depression	-	-1	PMID: 30140973	Children
37	IL6	P05231	Depression	-	1	PMID: 31612411
38	IL1B	P01584	Depression	-	1	PMID: 31612411
39	NOS2	P35228	Depression	-	1	PMID: 30306457
40	NET1	P23975	Depression	-	1	PMID: 26711676
41	TNF	P01375	Depression	-	1	PMID: 31612411
42	BDNF	P23560	Depression	-	-1	PMID: 30140973
